# Supplementary material
Source: publisher figshare collection journal article supplement (https://geolsoc.figshare.com/ndownloader/files/25398866)
Supplement: Supplementary file 1 [file 25398866]

**Table S1.** Zircon Lu–Hf isotopic data for the granitoids in the north Eastern Tianshan

| Spot No. | Age (Ma) | 176Yb/177Hf | 1σ | 176Lu/177Hf | 1σ | 176Hf/177Hf | 1σ | εHf(0) | εHf(t) | TDM (Ma) | TDMC (Ma) | fLu/Hf | Th/U | TDMC-Age | Age-TDM |
| --- | --- | --- | --- | --- | --- | --- | --- | --- | --- | --- | --- | --- | --- | --- | --- |
| **Harlik belt** |  |  |  |  |  |  |  |  |  |  |  |  |  |  |  |
| Diorite X3ET405 | |  |  |  |  |  |  |  |  |  |  |  |  |  |  |
| X3ET405-1 | 454.1 | 0.029668 | 0.000257 | 0.000979 | 0.000010 | 0.282887 | 0.000010 | 4.08 | 13.8 | 517 | 554 | -0.97 | 0.40 | 100 | -63 |
| X3ET405-2 | 455.6 | 0.030545 | 0.000123 | 0.001083 | 0.000007 | 0.282923 | 0.000009 | 5.35 | 15.1 | 467 | 474 | -0.97 | 0.25 | 18 | -11 |
| X3ET405-3 | 452.2 | 0.027147 | 0.000133 | 0.001074 | 0.000003 | 0.282840 | 0.000008 | 2.40 | 12.0 | 585 | 664 | -0.97 | 0.29 | 211 | -133 |
| X3ET405-4 | 456.9 | 0.028031 | 0.000174 | 0.000933 | 0.000008 | 0.282878 | 0.000008 | 3.74 | 13.5 | 529 | 573 | -0.97 | 0.31 | 116 | -73 |
| X3ET405-5 | 452.3 | 0.039227 | 0.000511 | 0.001313 | 0.000019 | 0.282844 | 0.000008 | 2.55 | 12.1 | 583 | 658 | -0.96 | 0.26 | 206 | -131 |
| X3ET405-6 | 452.4 | 0.021834 | 0.000076 | 0.000771 | 0.000001 | 0.282875 | 0.000009 | 3.66 | 13.4 | 531 | 578 | -0.98 | 0.28 | 125 | -78 |
| X3ET405-7 | 446.6 | 0.022901 | 0.000061 | 0.000800 | 0.000001 | 0.282948 | 0.000008 | 6.22 | 15.8 | 429 | 418 | -0.98 | 0.30 | -29 | 18 |
| X3ET405-8 | 445.7 | 0.049543 | 0.000145 | 0.001697 | 0.000008 | 0.282879 | 0.000010 | 3.79 | 13.1 | 539 | 591 | -0.95 | 0.41 | 145 | -93 |
| X3ET405-9 | 449.3 | 0.021096 | 0.000492 | 0.000684 | 0.000012 | 0.282875 | 0.000010 | 3.65 | 13.3 | 530 | 578 | -0.98 | 0.43 | 129 | -80 |
| X3ET405-10 | 451.4 | 0.026296 | 0.000152 | 0.000910 | 0.000003 | 0.282880 | 0.000010 | 3.82 | 13.5 | 526 | 570 | -0.97 | 0.26 | 119 | -74 |
| X3ET405-11 | 449 | 0.034466 | 0.000123 | 0.001220 | 0.000006 | 0.282888 | 0.000009 | 4.12 | 13.7 | 518 | 559 | -0.96 | 0.32 | 110 | -69 |
| X3ET405-12 | 448.2 | 0.036519 | 0.000094 | 0.001185 | 0.000000 | 0.282900 | 0.000009 | 4.53 | 14.1 | 501 | 532 | -0.96 | 0.42 | 84 | -53 |
| X3ET405-13 | 457.8 | 0.036937 | 0.000249 | 0.001226 | 0.000004 | 0.282910 | 0.000009 | 4.89 | 14.6 | 487 | 505 | -0.96 | 0.36 | 47 | -30 |
| X3ET405-14 | 449.7 | 0.035207 | 0.000153 | 0.001125 | 0.000001 | 0.282918 | 0.000009 | 5.16 | 14.7 | 475 | 490 | -0.97 | 0.46 | 40 | -25 |
| X3ET405-15 | 452.5 | 0.022519 | 0.000092 | 0.000791 | 0.000002 | 0.282900 | 0.000009 | 4.51 | 14.3 | 497 | 523 | -0.98 | 0.28 | 71 | -44 |
| X3ET405-16 | 451.9 | 0.018521 | 0.000044 | 0.000632 | 0.000003 | 0.282911 | 0.000009 | 4.92 | 14.7 | 479 | 495 | -0.98 | 0.29 | 43 | -27 |
| X3ET405-17 | 452.8 | 0.035107 | 0.000410 | 0.001180 | 0.000017 | 0.282906 | 0.000010 | 4.73 | 14.4 | 493 | 516 | -0.96 | 0.34 | 64 | -40 |
| X3ET405-18 | 457.1 | 0.031683 | 0.000222 | 0.001077 | 0.000008 | 0.282908 | 0.000009 | 4.80 | 14.5 | 489 | 508 | -0.97 | 0.29 | 51 | -32 |
| X3ET405-19 | 451.4 | 0.028030 | 0.000067 | 0.000961 | 0.000001 | 0.282859 | 0.000010 | 3.07 | 12.7 | 557 | 619 | -0.97 | 0.35 | 168 | -105 |
| X3ET405-20 | 449.2 | 0.048491 | 0.000392 | 0.001558 | 0.000017 | 0.282907 | 0.000009 | 4.76 | 14.2 | 497 | 524 | -0.95 | 0.36 | 75 | -48 |
| **Dananhu belt** |  |  |  |  |  |  |  |  |  |  |  |  |  |  |  |
| Diorite X3ET355 | |  |  |  |  |  |  |  |  |  |  |  |  |  |  |
| X3ET355-01 | 438.7 | 0.095738 | 0.001010 | 0.002992 | 0.000021 | 0.282841 | 0.000010 | 2.42 | 11.2 | 616 | 706 | -0.91 | 0.37 | 267 | -177 |
| X3ET355-02 | 445.5 | 0.042320 | 0.000215 | 0.001380 | 0.000014 | 0.282923 | 0.000009 | 5.34 | 14.8 | 471 | 485 | -0.96 | 0.41 | 40 | -25 |
| X3ET355-03 | 438.2 | 0.070140 | 0.002361 | 0.002437 | 0.000079 | 0.282775 | 0.000012 | 0.09 | 9.0 | 703 | 844 | -0.93 | 0.36 | 406 | -265 |
| X3ET355-04 | 447.7 | 0.100774 | 0.000872 | 0.003030 | 0.000031 | 0.282857 | 0.000010 | 3.01 | 12.0 | 592 | 665 | -0.91 | 0.46 | 217 | -144 |
| X3ET355-05 | 436.9 | 0.067849 | 0.001850 | 0.002437 | 0.000067 | 0.282927 | 0.000012 | 5.47 | 14.4 | 479 | 502 | -0.93 | 0.31 | 65 | -42 |
| X3ET355-06 | 445.3 | 0.031101 | 0.000101 | 0.000973 | 0.000006 | 0.282879 | 0.000009 | 3.78 | 13.3 | 529 | 578 | -0.97 | 0.33 | 133 | -83 |
| X3ET355-07 | 437 | 0.071271 | 0.000767 | 0.002480 | 0.000027 | 0.282840 | 0.000010 | 2.40 | 11.3 | 608 | 698 | -0.93 | 0.36 | 261 | -171 |
| X3ET355-08 | 445.3 | 0.078928 | 0.001117 | 0.002435 | 0.000037 | 0.282887 | 0.000009 | 4.06 | 13.2 | 538 | 588 | -0.93 | 0.46 | 142 | -93 |
| X3ET355-09 | 448.5 | 0.034258 | 0.000251 | 0.001127 | 0.000012 | 0.282843 | 0.000010 | 2.52 | 12.1 | 582 | 659 | -0.97 | 0.29 | 211 | -133 |
| X3ET355-10 | 448.2 | 0.080585 | 0.000714 | 0.002867 | 0.000030 | 0.282808 | 0.000010 | 1.26 | 10.3 | 663 | 773 | -0.91 | 0.45 | 324 | -215 |
| X3ET355-11 | 431.5 | 0.080012 | 0.000429 | 0.002834 | 0.000010 | 0.282855 | 0.000011 | 2.95 | 11.6 | 591 | 673 | -0.91 | 0.36 | 241 | -159 |
| X3ET355-12 | 445.2 | 0.047237 | 0.000319 | 0.001477 | 0.000005 | 0.282894 | 0.000009 | 4.32 | 13.7 | 514 | 553 | -0.96 | 0.22 | 107 | -68 |
| X3ET355-13 | 442.8 | 0.067705 | 0.000769 | 0.002052 | 0.000019 | 0.282882 | 0.000008 | 3.89 | 13.0 | 540 | 593 | -0.94 | 0.37 | 150 | -97 |
| X3ET355-14 | 434.4 | 0.137163 | 0.001579 | 0.004679 | 0.000069 | 0.282769 | 0.000014 | -0.10 | 8.1 | 758 | 900 | -0.86 | 0.47 | 465 | -324 |
| X3ET355-15 | 446.8 | 0.047403 | 0.001137 | 0.001544 | 0.000029 | 0.282849 | 0.000010 | 2.74 | 12.1 | 579 | 654 | -0.95 | 0.28 | 207 | -132 |
| X3ET355-16 | 446 | 0.037036 | 0.000327 | 0.001218 | 0.000015 | 0.282900 | 0.000010 | 4.52 | 14.0 | 502 | 535 | -0.96 | 0.33 | 89 | -56 |
| X3ET355-17 | 445.1 | 0.069309 | 0.000682 | 0.002154 | 0.000025 | 0.282915 | 0.000008 | 5.07 | 14.2 | 492 | 518 | -0.94 | 0.27 | 73 | -47 |
| X3ET355-18 | 443.4 | 0.034108 | 0.000722 | 0.001060 | 0.000019 | 0.282940 | 0.000012 | 5.96 | 15.4 | 442 | 442 | -0.97 | 0.13 | -2 | 1 |
| X3ET355-19 | 448.1 | 0.072748 | 0.000190 | 0.002314 | 0.000019 | 0.282869 | 0.000008 | 3.41 | 12.6 | 563 | 625 | -0.93 | 0.45 | 177 | -115 |
| X3ET355-20 | 441.7 | 0.063141 | 0.000898 | 0.001920 | 0.000032 | 0.282926 | 0.000011 | 5.45 | 14.6 | 473 | 491 | -0.94 | 0.39 | 49 | -32 |
| Granite X3ET340 | |  |  |  |  |  |  |  |  |  |  |  |  |  |  |
| X3ET340-01 | 427.6 | 0.035695 | 0.000153 | 0.001152 | 0.000004 | 0.282919 | 0.000009 | 5.20 | 14.3 | 474 | 501 | -0.97 | 0.20 | 73 | -46 |
| X3ET340-03 | 455.1 | 0.050953 | 0.000485 | 0.001809 | 0.000026 | 0.282825 | 0.000011 | 1.89 | 11.4 | 618 | 709 | -0.95 | 0.20 | 254 | -163 |
| X3ET340-04 | 453.5 | 0.051539 | 0.000650 | 0.001682 | 0.000026 | 0.282936 | 0.000010 | 5.79 | 15.3 | 456 | 458 | -0.95 | 0.23 | 4 | -3 |
| X3ET340-05 | 425 | 0.066170 | 0.000652 | 0.002180 | 0.000028 | 0.282859 | 0.000010 | 3.07 | 11.8 | 575 | 657 | -0.93 | 0.35 | 232 | -150 |
| X3ET340-06 | 459.1 | 0.121989 | 0.003008 | 0.003989 | 0.000110 | 0.282871 | 0.000010 | 3.48 | 12.4 | 587 | 647 | -0.88 | 0.35 | 188 | -128 |
| X3ET340-07 | 441.8 | 0.042276 | 0.000303 | 0.001387 | 0.000007 | 0.282937 | 0.000009 | 5.84 | 15.2 | 451 | 456 | -0.96 | 0.25 | 14 | -9 |
| X3ET340-09 | 444.1 | 0.030260 | 0.000538 | 0.000960 | 0.000013 | 0.282902 | 0.000009 | 4.61 | 14.1 | 495 | 525 | -0.97 | 0.20 | 81 | -51 |
| X3ET340-10 | 453.9 | 0.053157 | 0.000181 | 0.001751 | 0.000015 | 0.282890 | 0.000009 | 4.18 | 13.7 | 523 | 562 | -0.95 | 0.27 | 108 | -69 |
| X3ET340-12 | 462.6 | 0.083382 | 0.001462 | 0.003129 | 0.000063 | 0.282806 | 0.000012 | 1.19 | 10.4 | 671 | 775 | -0.91 | 0.23 | 312 | -208 |
| X3ET340-13 | 433.5 | 0.085684 | 0.000623 | 0.003154 | 0.000026 | 0.282802 | 0.000012 | 1.07 | 9.7 | 676 | 797 | -0.90 | 0.27 | 364 | -242 |
| X3ET340-14 | 446.4 | 0.040102 | 0.000210 | 0.001284 | 0.000008 | 0.282904 | 0.000008 | 4.65 | 14.1 | 498 | 527 | -0.96 | 0.19 | 81 | -51 |
| X3ET340-15 | 432.7 | 0.085243 | 0.003546 | 0.002568 | 0.000099 | 0.282875 | 0.000009 | 3.65 | 12.4 | 557 | 623 | -0.92 | 0.19 | 190 | -125 |
| X3ET340-16 | 448.1 | 0.077058 | 0.000694 | 0.002889 | 0.000030 | 0.282853 | 0.000011 | 2.86 | 11.9 | 596 | 671 | -0.91 | 0.21 | 223 | -148 |
| X3ET340-17 | 436.3 | 0.029118 | 0.000293 | 0.000976 | 0.000007 | 0.282919 | 0.000009 | 5.18 | 14.5 | 472 | 494 | -0.97 | 0.24 | 57 | -36 |
| X3ET340-18 | 447.5 | 0.138026 | 0.000529 | 0.004187 | 0.000022 | 0.282897 | 0.000009 | 4.42 | 13.0 | 550 | 597 | -0.87 | 0.59 | 149 | -102 |
| X3ET340-19 | 433.2 | 0.067270 | 0.001156 | 0.002413 | 0.000047 | 0.282874 | 0.000009 | 3.60 | 12.4 | 557 | 623 | -0.93 | 0.20 | 190 | -124 |
| Porphyritic granite X3ET372 | | |  |  |  |  |  |  |  |  |  |  |  |  |  |
| X3ET372-01 | 361.8 | 0.046808 | 0.000478 | 0.001616 | 0.000009 | 0.282919 | 0.000009 | 5.19 | 12.8 | 480 | 547 | -0.95 | 0.59 | 185 | -118 |
| X3ET372-02 | 354.2 | 0.045053 | 0.000253 | 0.001505 | 0.000012 | 0.282902 | 0.000009 | 4.59 | 12.0 | 503 | 588 | -0.95 | 0.33 | 234 | -149 |
| X3ET372-03 | 359.6 | 0.049723 | 0.000452 | 0.001702 | 0.000024 | 0.282874 | 0.000010 | 3.62 | 11.1 | 545 | 650 | -0.95 | 0.27 | 290 | -186 |
| X3ET372-04 | 351.5 | 0.074748 | 0.001156 | 0.002440 | 0.000022 | 0.282934 | 0.000010 | 5.73 | 12.9 | 469 | 531 | -0.93 | 0.34 | 179 | -117 |
| X3ET372-05 | 361.4 | 0.055485 | 0.000457 | 0.001815 | 0.000019 | 0.282923 | 0.000010 | 5.33 | 12.9 | 477 | 542 | -0.95 | 0.48 | 180 | -116 |
| X3ET372-06 | 350.6 | 0.043047 | 0.000666 | 0.001378 | 0.000018 | 0.282922 | 0.000009 | 5.30 | 12.7 | 472 | 543 | -0.96 | 0.48 | 192 | -122 |
| X3ET372-07 | 360.4 | 0.034376 | 0.000327 | 0.001108 | 0.000010 | 0.282923 | 0.000009 | 5.32 | 13.0 | 468 | 532 | -0.97 | 0.36 | 171 | -108 |
| X3ET372-08 | 354.8 | 0.045081 | 0.000290 | 0.001488 | 0.000018 | 0.282852 | 0.000012 | 2.82 | 10.3 | 575 | 700 | -0.96 | 0.35 | 345 | -220 |
| X3ET372-09 | 357.7 | 0.044227 | 0.000272 | 0.001503 | 0.000016 | 0.282884 | 0.000008 | 3.97 | 11.5 | 528 | 625 | -0.95 | 0.51 | 268 | -170 |
| X3ET372-10 | 355.6 | 0.076706 | 0.001303 | 0.002337 | 0.000034 | 0.282949 | 0.000010 | 6.27 | 13.5 | 445 | 493 | -0.93 | 0.63 | 137 | -89 |
| X3ET372-11 | 353.5 | 0.052439 | 0.000438 | 0.001668 | 0.000014 | 0.282921 | 0.000009 | 5.25 | 12.6 | 478 | 548 | -0.95 | 0.27 | 195 | -125 |
| X3ET372-12 | 356.8 | 0.056460 | 0.000877 | 0.002075 | 0.000036 | 0.282888 | 0.000010 | 4.11 | 11.5 | 531 | 626 | -0.94 | 0.38 | 269 | -174 |
| X3ET372-13 | 354.8 | 0.063488 | 0.000066 | 0.002126 | 0.000004 | 0.282907 | 0.000010 | 4.76 | 12.1 | 505 | 586 | -0.94 | 0.55 | 231 | -150 |
| X3ET372-14 | 351.3 | 0.059294 | 0.000441 | 0.001793 | 0.000017 | 0.282914 | 0.000009 | 5.02 | 12.3 | 490 | 567 | -0.95 | 0.43 | 215 | -138 |
| X3ET372-15 | 361.4 | 0.082727 | 0.000474 | 0.002457 | 0.000012 | 0.282919 | 0.000009 | 5.21 | 12.6 | 490 | 559 | -0.93 | 0.53 | 197 | -129 |
| X3ET372-16 | 355.3 | 0.060024 | 0.000389 | 0.002305 | 0.000015 | 0.282854 | 0.000016 | 2.89 | 10.2 | 585 | 708 | -0.93 | 0.39 | 352 | -229 |
| X3ET372-17 | 361.5 | 0.055953 | 0.000294 | 0.001750 | 0.000012 | 0.282941 | 0.000008 | 5.96 | 13.5 | 450 | 500 | -0.95 | 0.24 | 138 | -89 |
| X3ET372-18 | 354.9 | 0.035503 | 0.000318 | 0.001110 | 0.000015 | 0.282930 | 0.000009 | 5.59 | 13.1 | 458 | 518 | -0.97 | 0.26 | 163 | -103 |
| X3ET372-19 | 362.1 | 0.055099 | 0.000266 | 0.001803 | 0.000012 | 0.282959 | 0.000009 | 6.60 | 14.1 | 425 | 460 | -0.95 | 0.87 | 98 | -63 |
| X3ET372-20 | 357.3 | 0.063984 | 0.000589 | 0.002379 | 0.000015 | 0.282865 | 0.000012 | 3.29 | 10.6 | 569 | 682 | -0.93 | 0.63 | 325 | -212 |
| K-feldspar granite X3ET459 | |  |  |  |  |  |  |  |  |  |  |  |  |  |  |
| X3ET459-01 | 317.5 | 0.053518 | 0.000243 | 0.001869 | 0.000017 | 0.282944 | 0.000012 | 6.09 | 12.7 | 447 | 518 | -0.94 | 0.48 | 201 | -129 |
| X3ET459-02 | 311.8 | 0.040605 | 0.000416 | 0.001522 | 0.000019 | 0.282810 | 0.000014 | 1.33 | 7.87 | 636 | 820 | -0.95 | 0.36 | 509 | -324 |
| X3ET459-03 | 308.7 | 0.052393 | 0.000193 | 0.001886 | 0.000017 | 0.282830 | 0.000011 | 2.07 | 8.47 | 612 | 780 | -0.94 | 0.39 | 471 | -303 |
| X3ET459-04 | 321 | 0.039642 | 0.000146 | 0.001425 | 0.000010 | 0.282857 | 0.000010 | 2.99 | 9.75 | 567 | 708 | -0.96 | 0.65 | 387 | -246 |
| X3ET459-05 | 296.3 | 0.082456 | 0.001449 | 0.002700 | 0.000039 | 0.282974 | 0.000010 | 7.14 | 13.1 | 413 | 473 | -0.92 | 0.79 | 177 | -116 |
| X3ET459-06 | 308.6 | 0.040251 | 0.000174 | 0.001402 | 0.000011 | 0.282956 | 0.000011 | 6.50 | 13.0 | 424 | 491 | -0.96 | 0.23 | 182 | -116 |
| X3ET459-07 | 301.6 | 0.055339 | 0.000652 | 0.002107 | 0.000029 | 0.282797 | 0.000017 | 0.90 | 7.11 | 664 | 861 | -0.94 | 0.28 | 559 | -362 |
| X3ET459-08 | 314.7 | 0.115708 | 0.000563 | 0.004169 | 0.000031 | 0.282814 | 0.000019 | 1.50 | 7.55 | 677 | 843 | -0.87 | 0.34 | 528 | -363 |
| X3ET459-09 | 297.5 | 0.056924 | 0.000538 | 0.001925 | 0.000020 | 0.282886 | 0.000011 | 4.05 | 10.2 | 531 | 660 | -0.94 | 0.53 | 363 | -234 |
| X3ET459-10 | 314.5 | 0.067413 | 0.000178 | 0.002203 | 0.000013 | 0.282900 | 0.000011 | 4.53 | 11.0 | 515 | 624 | -0.93 | 0.45 | 309 | -201 |
| X3ET459-11 | 325.6 | 0.051185 | 0.000564 | 0.001709 | 0.000021 | 0.282899 | 0.000008 | 4.48 | 11.3 | 510 | 614 | -0.95 | 0.46 | 289 | -185 |
| X3ET459-12 | 316.9 | 0.059003 | 0.000830 | 0.002032 | 0.000023 | 0.282924 | 0.000011 | 5.37 | 11.9 | 478 | 567 | -0.94 | 0.54 | 250 | -161 |
| X3ET459-13 | 317.5 | 0.046128 | 0.000097 | 0.001542 | 0.000008 | 0.282867 | 0.000009 | 3.35 | 10.0 | 554 | 689 | -0.95 | 0.81 | 371 | -237 |
| X3ET459-14 | 316 | 0.036487 | 0.000263 | 0.001196 | 0.000009 | 0.282900 | 0.000010 | 4.54 | 11.2 | 501 | 609 | -0.96 | 0.22 | 293 | -185 |
| X3ET459-15 | 311.1 | 0.040935 | 0.000414 | 0.001523 | 0.000018 | 0.282808 | 0.000014 | 1.27 | 7.8 | 638 | 825 | -0.95 | 0.34 | 514 | -327 |
| X3ET459-16 | 318.5 | 0.059800 | 0.000684 | 0.002270 | 0.000024 | 0.282833 | 0.000021 | 2.16 | 8.7 | 615 | 774 | -0.93 | 0.56 | 455 | -296 |
| X3ET459-17 | 316.3 | 0.060032 | 0.000737 | 0.002098 | 0.000036 | 0.282893 | 0.000012 | 4.27 | 10.8 | 525 | 638 | -0.94 | 0.33 | 322 | -208 |
| X3ET459-18 | 318.6 | 0.037872 | 0.000163 | 0.001284 | 0.000002 | 0.282941 | 0.000009 | 5.98 | 12.7 | 444 | 516 | -0.96 | 0.45 | 198 | -125 |
| X3ET459-19 | 317.7 | 0.052014 | 0.000916 | 0.001833 | 0.000039 | 0.282882 | 0.000010 | 3.88 | 10.5 | 537 | 659 | -0.94 | 0.49 | 341 | -219 |
| X3ET459-20 | 307.9 | 0.042195 | 0.000138 | 0.001490 | 0.000003 | 0.282904 | 0.000011 | 4.67 | 11.1 | 500 | 609 | -0.96 | 0.44 | 301 | -192 |
| X3ET459-21 | 318.1 | 0.047275 | 0.000351 | 0.001699 | 0.000021 | 0.282915 | 0.000014 | 5.06 | 11.7 | 486 | 581 | -0.95 | 0.23 | 263 | -168 |
| **Kangguer belt** |  |  |  |  |  |  |  |  |  |  |  |  |  |  |  |
| Porphyritic granite X3ET239 | | |  |  |  |  |  |  |  |  |  |  |  |  |  |
| X3ET239-01 | 353 | 0.025909 | 0.000115 | 0.000887 | 0.000003 | 0.282872 | 0.000010 | 3.54 | 11.1 | 537 | 646 | -0.97 | 0.33 | 293 | -184 |
| X3ET239-02 | 364.2 | 0.027888 | 0.000083 | 0.000955 | 0.000002 | 0.282904 | 0.000009 | 4.66 | 12.5 | 493 | 569 | -0.97 | 0.45 | 205 | -129 |
| X3ET239-03 | 359.6 | 0.052244 | 0.000440 | 0.001688 | 0.000018 | 0.282899 | 0.000009 | 4.48 | 12.0 | 510 | 595 | -0.95 | 0.49 | 235 | -150 |
| X3ET239-04 | 368.7 | 0.024169 | 0.000181 | 0.000830 | 0.000007 | 0.282920 | 0.000009 | 5.24 | 13.2 | 468 | 527 | -0.98 | 0.56 | 159 | -99 |
| X3ET239-05 | 350.1 | 0.022697 | 0.000095 | 0.000708 | 0.000001 | 0.282933 | 0.000008 | 5.69 | 13.2 | 449 | 508 | -0.98 | 0.67 | 158 | -99 |
| X3ET239-06 | 352.4 | 0.034783 | 0.000121 | 0.001273 | 0.000011 | 0.282886 | 0.000012 | 4.01 | 11.5 | 523 | 622 | -0.96 | 0.85 | 270 | -171 |
| X3ET239-07 | 368.2 | 0.039950 | 0.000336 | 0.001429 | 0.000014 | 0.282919 | 0.000009 | 5.22 | 13.0 | 477 | 539 | -0.96 | 0.44 | 171 | -109 |
| X3ET239-08 | 366.4 | 0.031841 | 0.000195 | 0.001178 | 0.000012 | 0.282888 | 0.000009 | 4.09 | 11.9 | 519 | 608 | -0.96 | 0.42 | 242 | -153 |
| X3ET239-09 | 354.7 | 0.032083 | 0.000041 | 0.001089 | 0.000001 | 0.282905 | 0.000008 | 4.71 | 12.3 | 493 | 574 | -0.97 | 0.95 | 219 | -138 |
| X3ET239-10 | 361.4 | 0.023136 | 0.000116 | 0.000831 | 0.000007 | 0.282874 | 0.000008 | 3.59 | 11.4 | 534 | 637 | -0.97 | 0.33 | 276 | -173 |
| X3ET239-11 | 355.4 | 0.037983 | 0.000340 | 0.001289 | 0.000015 | 0.282930 | 0.000008 | 5.60 | 13.1 | 459 | 519 | -0.96 | 0.45 | 164 | -104 |
| X3ET239-12 | 352.2 | 0.034997 | 0.000060 | 0.001168 | 0.000004 | 0.282926 | 0.000008 | 5.44 | 12.9 | 464 | 530 | -0.96 | 0.65 | 178 | -112 |
| X3ET239-13 | 353.8 | 0.045419 | 0.000534 | 0.001471 | 0.000019 | 0.282897 | 0.000009 | 4.43 | 11.9 | 509 | 598 | -0.96 | 0.76 | 244 | -156 |
| X3ET239-14 | 366.2 | 0.046431 | 0.000508 | 0.001561 | 0.000020 | 0.282925 | 0.000009 | 5.42 | 13.1 | 470 | 529 | -0.95 | 0.28 | 163 | -104 |
| X3ET239-15 | 370.7 | 0.033815 | 0.000068 | 0.001067 | 0.000003 | 0.282924 | 0.000008 | 5.37 | 13.3 | 466 | 522 | -0.97 | 0.53 | 151 | -95 |
| X3ET239-16 | 354.8 | 0.050199 | 0.000259 | 0.001611 | 0.000010 | 0.282932 | 0.000009 | 5.66 | 13.1 | 461 | 521 | -0.95 | 0.48 | 166 | -106 |
| X3ET239-17 | 352.9 | 0.029021 | 0.000083 | 0.000953 | 0.000002 | 0.282916 | 0.000008 | 5.09 | 12.6 | 476 | 548 | -0.97 | 0.66 | 195 | -123 |
| X3ET239-18 | 369.2 | 0.062559 | 0.000743 | 0.002056 | 0.000021 | 0.282929 | 0.000009 | 5.57 | 13.2 | 470 | 526 | -0.94 | 0.65 | 156 | -101 |
| X3ET239-19 | 356.9 | 0.033618 | 0.000260 | 0.001235 | 0.000015 | 0.282890 | 0.000013 | 4.18 | 11.7 | 516 | 608 | -0.96 | 0.34 | 252 | -159 |
| X3ET239-20 | 353.2 | 0.031286 | 0.000121 | 0.001057 | 0.000002 | 0.282890 | 0.000007 | 4.16 | 11.7 | 514 | 609 | -0.97 | 0.39 | 256 | -161 |
| Porphyritic granodiorite X3ET232 | | |  |  |  |  |  |  |  |  |  |  |  |  |  |
| X3ET232-01 | 327.3 | 0.042689 | 0.000396 | 0.001409 | 0.000011 | 0.282939 | 0.000008 | 5.92 | 12.8 | 448 | 517 | -0.96 | 0.64 | 190 | -120 |
| X3ET232-02 | 321 | 0.045543 | 0.000685 | 0.001592 | 0.000020 | 0.282943 | 0.000009 | 6.05 | 12.8 | 445 | 515 | -0.95 | 0.73 | 194 | -124 |
| X3ET232-03 | 321.6 | 0.028826 | 0.000266 | 0.001072 | 0.000013 | 0.282947 | 0.000011 | 6.19 | 13.0 | 433 | 499 | -0.97 | 0.44 | 177 | -112 |
| X3ET232-04 | 314.5 | 0.027283 | 0.000229 | 0.000925 | 0.000005 | 0.282901 | 0.000009 | 4.54 | 11.3 | 497 | 606 | -0.97 | 0.38 | 291 | -183 |
| X3ET232-05 | 314 | 0.043560 | 0.000326 | 0.001443 | 0.000011 | 0.282894 | 0.000008 | 4.30 | 10.9 | 514 | 629 | -0.96 | 0.42 | 315 | -200 |
| X3ET232-06 | 326.9 | 0.024125 | 0.000319 | 0.000807 | 0.000007 | 0.282961 | 0.000009 | 6.68 | 13.7 | 410 | 461 | -0.98 | 0.36 | 134 | -84 |
| X3ET232-07 | 317 | 0.031545 | 0.000254 | 0.001078 | 0.000006 | 0.282920 | 0.000008 | 5.24 | 12.0 | 471 | 562 | -0.97 | 0.55 | 245 | -154 |
| X3ET232-08 | 325.3 | 0.024241 | 0.000125 | 0.000839 | 0.000003 | 0.282945 | 0.000007 | 6.10 | 13.1 | 434 | 499 | -0.97 | 0.72 | 173 | -108 |
| X3ET232-09 | 313.9 | 0.037611 | 0.000159 | 0.001298 | 0.000003 | 0.282919 | 0.000008 | 5.21 | 11.9 | 475 | 569 | -0.96 | 0.37 | 255 | -161 |
| X3ET232-10 | 308.8 | 0.037675 | 0.000127 | 0.001277 | 0.000002 | 0.282934 | 0.000009 | 5.74 | 12.3 | 453 | 537 | -0.96 | 0.32 | 229 | -145 |
| X3ET232-11 | 311.8 | 0.045047 | 0.000585 | 0.001602 | 0.000022 | 0.282876 | 0.000010 | 3.67 | 10.2 | 542 | 672 | -0.95 | 0.75 | 360 | -230 |
| X3ET232-12 | 312.8 | 0.037344 | 0.000211 | 0.001411 | 0.000013 | 0.282899 | 0.000009 | 4.48 | 11.1 | 506 | 617 | -0.96 | 0.44 | 304 | -193 |
| X3ET232-13 | 333.5 | 0.042316 | 0.000313 | 0.001472 | 0.000006 | 0.282905 | 0.000007 | 4.70 | 11.7 | 498 | 592 | -0.96 | 0.35 | 259 | -165 |
| X3ET232-14 | 331.7 | 0.041111 | 0.000368 | 0.001412 | 0.000015 | 0.282908 | 0.000009 | 4.80 | 11.8 | 493 | 586 | -0.96 | 0.46 | 254 | -162 |
| X3ET232-15 | 318.6 | 0.025477 | 0.000608 | 0.000915 | 0.000017 | 0.282886 | 0.000010 | 4.03 | 10.9 | 518 | 636 | -0.97 | 0.22 | 317 | -199 |
| X3ET232-16 | 312.5 | 0.038421 | 0.000397 | 0.001306 | 0.000006 | 0.282911 | 0.000009 | 4.92 | 11.5 | 487 | 588 | -0.96 | 0.35 | 275 | -175 |
| X3ET232-17 | 302.9 | 0.037652 | 0.000682 | 0.001206 | 0.000017 | 0.282947 | 0.000009 | 6.19 | 12.6 | 435 | 511 | -0.96 | 0.24 | 209 | -132 |
| X3ET232-18 | 306.4 | 0.052260 | 0.000688 | 0.001503 | 0.000017 | 0.282906 | 0.000009 | 4.73 | 11.2 | 497 | 606 | -0.95 | 0.53 | 300 | -191 |
| X3ET232-19 | 296.2 | 0.043806 | 0.000416 | 0.001685 | 0.000018 | 0.282846 | 0.000012 | 2.61 | 8.8 | 586 | 750 | -0.95 | 0.75 | 453 | -290 |
| X3ET232-20 | 307.4 | 0.030833 | 0.000215 | 0.001020 | 0.000008 | 0.282961 | 0.000008 | 6.69 | 13.3 | 412 | 474 | -0.97 | 0.54 | 167 | -105 |
| Granodiorite porphyry X3ET222 | | |  |  |  |  |  |  |  |  |  |  |  |  |  |
| X3ET222-01 | 306.4 | 0.047646 | 0.000281 | 0.001530 | 0.000005 | 0.282953 | 0.000009 | 6.40 | 12.8 | 430 | 500 | -0.95 | 0.49 | 193 | -123 |
| X3ET222-04 | 311.1 | 0.026083 | 0.000131 | 0.000903 | 0.000005 | 0.282969 | 0.000009 | 6.97 | 13.6 | 400 | 453 | -0.97 | 0.48 | 142 | -89 |
| X3ET222-06 | 328.7 | 0.018914 | 0.000057 | 0.000598 | 0.000003 | 0.282948 | 0.000010 | 6.23 | 13.3 | 426 | 485 | -0.98 | 0.37 | 157 | -97 |
| X3ET222-07 | 308.1 | 0.043675 | 0.000068 | 0.001490 | 0.000006 | 0.282981 | 0.000010 | 7.41 | 13.9 | 388 | 434 | -0.96 | 0.48 | 126 | -80 |
| X3ET222-08 | 308.2 | 0.033050 | 0.000345 | 0.001170 | 0.000017 | 0.282893 | 0.000011 | 4.27 | 10.8 | 511 | 630 | -0.96 | 0.53 | 322 | -203 |
| X3ET222-10 | 311.2 | 0.033031 | 0.000317 | 0.001123 | 0.000010 | 0.282912 | 0.000008 | 4.94 | 11.6 | 484 | 585 | -0.97 | 0.44 | 274 | -173 |
| X3ET222-12 | 324.8 | 0.050902 | 0.000367 | 0.001753 | 0.000010 | 0.282949 | 0.000009 | 6.24 | 13.0 | 439 | 502 | -0.95 | 0.39 | 178 | -114 |
| X3ET222-14 | 310.8 | 0.032296 | 0.000344 | 0.001109 | 0.000009 | 0.282972 | 0.000009 | 7.07 | 13.7 | 398 | 449 | -0.97 | 0.47 | 138 | -87 |
| X3ET222-15 | 312.5 | 0.036132 | 0.000141 | 0.001083 | 0.000004 | 0.282979 | 0.000007 | 7.31 | 14.0 | 388 | 432 | -0.97 | 0.55 | 120 | -76 |
| X3ET222-16 | 310.4 | 0.047687 | 0.000234 | 0.001588 | 0.000004 | 0.282962 | 0.000010 | 6.73 | 13.2 | 417 | 477 | -0.95 | 0.61 | 167 | -107 |
| X3ET222-17 | 312.2 | 0.022706 | 0.000292 | 0.000708 | 0.000008 | 0.282942 | 0.000007 | 6.00 | 12.7 | 436 | 511 | -0.98 | 0.29 | 199 | -124 |
| X3ET222-18 | 312.7 | 0.047421 | 0.000856 | 0.001446 | 0.000028 | 0.282947 | 0.000009 | 6.17 | 12.8 | 438 | 510 | -0.96 | 0.24 | 197 | -125 |
| X3ET222-19 | 316.2 | 0.042405 | 0.000129 | 0.001321 | 0.000004 | 0.282957 | 0.000009 | 6.53 | 13.2 | 422 | 483 | -0.96 | 0.39 | 167 | -106 |
| X3ET222-20 | 309.7 | 0.025271 | 0.000353 | 0.000874 | 0.000015 | 0.282957 | 0.000009 | 6.54 | 13.2 | 417 | 481 | -0.97 | 0.48 | 171 | -107 |
| X3ET222-22 | 317.2 | 0.015411 | 0.000164 | 0.000523 | 0.000004 | 0.282968 | 0.000008 | 6.92 | 13.8 | 398 | 447 | -0.98 | 0.53 | 130 | -80 |
| X3ET222-23 | 313 | 0.014788 | 0.000053 | 0.000496 | 0.000000 | 0.282987 | 0.000008 | 7.60 | 14.4 | 370 | 406 | -0.99 | 0.55 | 93 | -57 |
| X3ET222-24 | 319.1 | 0.025999 | 0.000157 | 0.000859 | 0.000004 | 0.282960 | 0.000010 | 6.65 | 13.5 | 412 | 468 | -0.97 | 0.65 | 149 | -93 |
| Granodiorite X3ET223 | |  |  |  |  |  |  |  |  |  |  |  |  |  |  |
| X3ET223-01 | 307.7 | 0.044839 | 0.000586 | 0.001474 | 0.000021 | 0.282974 | 0.000010 | 7.14 | 13.6 | 399 | 451 | -0.96 | 0.53 | 143 | -91 |
| X3ET223-02 | 308.4 | 0.047266 | 0.000474 | 0.001668 | 0.000018 | 0.283011 | 0.000009 | 8.44 | 14.9 | 348 | 370 | -0.95 | 0.66 | 62 | -39 |
| X3ET223-03 | 298.5 | 0.040160 | 0.000551 | 0.001411 | 0.000019 | 0.282921 | 0.000008 | 5.26 | 11.5 | 475 | 576 | -0.96 | 0.47 | 277 | -176 |
| X3ET223-04 | 303.8 | 0.041702 | 0.000111 | 0.001515 | 0.000012 | 0.282890 | 0.000010 | 4.17 | 10.6 | 520 | 643 | -0.95 | 0.66 | 340 | -216 |
| X3ET223-06 | 307.1 | 0.034158 | 0.000391 | 0.001136 | 0.000012 | 0.282901 | 0.000009 | 4.57 | 11.1 | 499 | 611 | -0.97 | 0.57 | 304 | -192 |
| X3ET223-07 | 302.7 | 0.051672 | 0.000615 | 0.001757 | 0.000017 | 0.282917 | 0.000009 | 5.14 | 11.4 | 484 | 586 | -0.95 | 0.58 | 283 | -181 |
| X3ET223-08 | 296.5 | 0.048197 | 0.000202 | 0.001677 | 0.000003 | 0.282958 | 0.000009 | 6.59 | 12.8 | 424 | 495 | -0.95 | 0.63 | 199 | -127 |
| X3ET223-09 | 294.2 | 0.040930 | 0.000266 | 0.001338 | 0.000011 | 0.282954 | 0.000009 | 6.42 | 12.6 | 427 | 503 | -0.96 | 0.57 | 209 | -132 |
| X3ET223-10 | 302.7 | 0.026493 | 0.000305 | 0.000922 | 0.000011 | 0.282955 | 0.000009 | 6.47 | 13.0 | 420 | 490 | -0.97 | 0.55 | 187 | -117 |
| X3ET223-12 | 297.1 | 0.021925 | 0.000313 | 0.000774 | 0.000010 | 0.282930 | 0.000007 | 5.59 | 12.0 | 454 | 548 | -0.98 | 0.46 | 250 | -156 |
| X3ET223-14 | 300.4 | 0.025443 | 0.000239 | 0.000852 | 0.000007 | 0.282955 | 0.000008 | 6.46 | 12.9 | 420 | 491 | -0.97 | 0.47 | 190 | -119 |
| X3ET223-15 | 311.1 | 0.033763 | 0.000335 | 0.001112 | 0.000008 | 0.282899 | 0.000011 | 4.51 | 11.1 | 501 | 613 | -0.97 | 0.51 | 302 | -190 |
| X3ET223-16 | 296.6 | 0.042509 | 0.000361 | 0.001497 | 0.000016 | 0.282934 | 0.000011 | 5.75 | 12.0 | 456 | 547 | -0.95 | 0.45 | 250 | -159 |
| X3ET223-18 | 303.7 | 0.028645 | 0.000358 | 0.000933 | 0.000011 | 0.282944 | 0.000008 | 6.07 | 12.6 | 436 | 515 | -0.97 | 0.65 | 211 | -133 |
| X3ET223-19 | 302 | 0.031861 | 0.000292 | 0.001270 | 0.000012 | 0.282945 | 0.000008 | 6.13 | 12.5 | 438 | 517 | -0.96 | 0.42 | 215 | -136 |
| **Yamansu belt** |  |  |  |  |  |  |  |  |  |  |  |  |  |  |  |
| Granodiorite X3SS01 | |  |  |  |  |  |  |  |  |  |  |  |  |  |  |
| X3SS01-01 | 334.1 | 0.046144 | 0.000276 | 0.001644 | 0.000010 | 0.282678 | 0.000009 | -3.34 | 3.65 | 828 | 1106 | -0.95 | 0.61 | 772 | -494 |
| X3SS01-02 | 338.3 | 0.043284 | 0.000192 | 0.001522 | 0.000011 | 0.282735 | 0.000009 | -1.32 | 5.78 | 743 | 974 | -0.95 | 0.52 | 636 | -405 |
| X3SS01-03 | 337 | 0.037194 | 0.000379 | 0.001342 | 0.000009 | 0.282698 | 0.000008 | -2.62 | 4.49 | 792 | 1055 | -0.96 | 0.59 | 718 | -455 |
| X3SS01-04 | 337.9 | 0.035063 | 0.000206 | 0.001206 | 0.000003 | 0.282630 | 0.000010 | -5.02 | 2.14 | 886 | 1205 | -0.96 | 0.58 | 867 | -548 |
| X3SS01-05 | 336.7 | 0.042649 | 0.000247 | 0.001568 | 0.000005 | 0.282706 | 0.000008 | -2.34 | 4.71 | 786 | 1040 | -0.95 | 0.60 | 704 | -449 |
| X3SS01-08 | 342.2 | 0.047962 | 0.000200 | 0.001680 | 0.000003 | 0.282656 | 0.000010 | -4.09 | 3.06 | 859 | 1150 | -0.95 | 0.58 | 807 | -517 |
| X3SS01-09 | 342.1 | 0.038630 | 0.000140 | 0.001386 | 0.000004 | 0.282682 | 0.000009 | -3.19 | 4.03 | 816 | 1088 | -0.96 | 0.57 | 746 | -474 |
| X3SS01-10 | 343.9 | 0.036376 | 0.000350 | 0.001326 | 0.000009 | 0.282672 | 0.000009 | -3.53 | 3.73 | 828 | 1108 | -0.96 | 0.52 | 764 | -485 |
| X3SS01-11 | 332.1 | 0.050873 | 0.000314 | 0.001936 | 0.000020 | 0.282613 | 0.000013 | -5.61 | 1.27 | 927 | 1255 | -0.94 | 0.60 | 923 | -595 |
| X3SS01-12 | 342.7 | 0.040443 | 0.000276 | 0.001423 | 0.000006 | 0.282732 | 0.000009 | -1.42 | 5.80 | 745 | 976 | -0.96 | 0.64 | 634 | -403 |
| X3SS01-13 | 342.3 | 0.040616 | 0.000125 | 0.001444 | 0.000002 | 0.282747 | 0.000009 | -0.89 | 6.31 | 724 | 943 | -0.96 | 0.52 | 601 | -382 |
| X3SS01-14 | 337.4 | 0.035495 | 0.000088 | 0.001299 | 0.000006 | 0.282713 | 0.000009 | -2.09 | 5.04 | 770 | 1020 | -0.96 | 0.51 | 683 | -432 |
| X3SS01-15 | 341 | 0.050442 | 0.000393 | 0.001650 | 0.000007 | 0.282724 | 0.000009 | -1.69 | 5.44 | 761 | 998 | -0.95 | 0.52 | 657 | -420 |
| X3SS01-16 | 328.8 | 0.046714 | 0.000253 | 0.001641 | 0.000005 | 0.282679 | 0.000010 | -3.29 | 3.58 | 826 | 1106 | -0.95 | 0.51 | 777 | -497 |
| X3SS01-17 | 334.8 | 0.028997 | 0.000238 | 0.001053 | 0.000006 | 0.282739 | 0.000009 | -1.18 | 5.96 | 728 | 960 | -0.97 | 0.57 | 625 | -393 |
| X3SS01-20 | 339.7 | 0.049810 | 0.000340 | 0.001728 | 0.000016 | 0.282682 | 0.000010 | -3.18 | 3.91 | 823 | 1094 | -0.95 | 0.55 | 754 | -483 |
| X3SS01-21 | 331.4 | 0.040917 | 0.000175 | 0.001470 | 0.000007 | 0.282663 | 0.000009 | -3.87 | 3.10 | 845 | 1139 | -0.96 | 0.99 | 808 | -514 |
| Diorite X3SS08 | |  |  |  |  |  |  |  |  |  |  |  |  |  |  |
| X3SS08-01 | 333.1 | 0.043874 | 0.000422 | 0.001699 | 0.000026 | 0.282648 | 0.000012 | -4.37 | 2.58 | 871 | 1173 | -0.95 | 0.58 | 840 | -538 |
| X3SS08-03 | 325.5 | 0.042547 | 0.000583 | 0.001608 | 0.000019 | 0.282723 | 0.000010 | -1.72 | 5.10 | 761 | 1008 | -0.95 | 0.56 | 682 | -436 |
| X3SS08-05 | 340.3 | 0.075958 | 0.001328 | 0.002668 | 0.000041 | 0.282708 | 0.000009 | -2.27 | 4.62 | 807 | 1049 | -0.92 | 0.66 | 709 | -466 |
| X3SS08-06 | 343.1 | 0.181487 | 0.001497 | 0.006588 | 0.000073 | 0.282753 | 0.000012 | -0.68 | 5.37 | 831 | 1004 | -0.80 | 1.60 | 661 | -488 |
| X3SS08-07 | 324.4 | 0.051920 | 0.000735 | 0.001933 | 0.000035 | 0.282619 | 0.000012 | -5.41 | 1.31 | 919 | 1247 | -0.94 | 0.56 | 922 | -594 |
| X3SS08-08 | 335 | 0.044859 | 0.000158 | 0.001849 | 0.000009 | 0.282656 | 0.000013 | -4.09 | 2.87 | 863 | 1156 | -0.94 | 0.54 | 821 | -528 |
| X3SS08-09 | 330.8 | 0.035273 | 0.000256 | 0.001465 | 0.000006 | 0.282736 | 0.000014 | -1.27 | 5.68 | 740 | 974 | -0.96 | 0.61 | 644 | -409 |
| X3SS08-10 | 339.2 | 0.033189 | 0.000162 | 0.001261 | 0.000001 | 0.282755 | 0.000010 | -0.60 | 6.58 | 709 | 924 | -0.96 | 0.52 | 585 | -370 |
| X3SS08-11 | 335 | 0.037001 | 0.000139 | 0.001331 | 0.000008 | 0.282715 | 0.000009 | -2.02 | 5.06 | 768 | 1017 | -0.96 | 0.65 | 682 | -433 |
| X3SS08-14 | 334.8 | 0.128077 | 0.000740 | 0.004828 | 0.000021 | 0.282624 | 0.000013 | -5.23 | 1.06 | 990 | 1270 | -0.85 | 1.18 | 936 | -655 |
| X3SS08-15 | 338.1 | 0.057136 | 0.000291 | 0.002140 | 0.000009 | 0.282663 | 0.000011 | -3.85 | 3.11 | 860 | 1143 | -0.94 | 0.71 | 805 | -522 |
| X3SS08-16 | 338.3 | 0.163442 | 0.001275 | 0.005996 | 0.000028 | 0.282691 | 0.000013 | -2.86 | 3.24 | 916 | 1135 | -0.82 | 1.08 | 797 | -578 |
| X3SS08-17 | 335.6 | 0.033090 | 0.000206 | 0.001311 | 0.000004 | 0.282682 | 0.000012 | -3.18 | 3.91 | 814 | 1091 | -0.96 | 0.68 | 755 | -479 |
| X3SS08-18 | 334.7 | 0.129256 | 0.001656 | 0.004667 | 0.000041 | 0.282701 | 0.000012 | -2.49 | 3.83 | 864 | 1095 | -0.86 | 1.21 | 760 | -529 |
| X3SS08-19 | 335.8 | 0.036917 | 0.000112 | 0.001314 | 0.000006 | 0.282684 | 0.000009 | -3.12 | 3.98 | 811 | 1086 | -0.96 | 0.63 | 751 | -476 |
| X3SS08-21 | 329.9 | 0.034500 | 0.000337 | 0.001242 | 0.000011 | 0.282676 | 0.000011 | -3.41 | 3.58 | 822 | 1107 | -0.96 | 1.05 | 777 | -492 |
| Albitophyre X3SS14 | |  |  |  |  |  |  |  |  |  |  |  |  |  |  |
| X3SS14-01 | 331.9 | 0.024225 | 0.000121 | 0.000886 | 0.000002 | 0.282711 | 0.000009 | -2.16 | 4.95 | 764 | 1022 | -0.97 | 0.48 | 690 | -432 |
| X3SS14-02 | 333.1 | 0.024400 | 0.000073 | 0.000905 | 0.000007 | 0.282652 | 0.000009 | -4.25 | 2.87 | 848 | 1154 | -0.97 | 0.49 | 821 | -515 |
| X3SS14-03 | 332.9 | 0.031188 | 0.000093 | 0.001148 | 0.000001 | 0.282739 | 0.000008 | -1.18 | 5.89 | 730 | 963 | -0.97 | 0.51 | 630 | -397 |
| X3SS14-04 | 334.5 | 0.040409 | 0.000084 | 0.001433 | 0.000005 | 0.282685 | 0.000010 | -3.07 | 3.97 | 812 | 1086 | -0.96 | 0.70 | 752 | -478 |
| X3SS14-05 | 338.1 | 0.025138 | 0.000106 | 0.000878 | 0.000002 | 0.282711 | 0.000008 | -2.17 | 5.07 | 764 | 1019 | -0.97 | 0.52 | 681 | -426 |
| X3SS14-06 | 339.3 | 0.026902 | 0.000071 | 0.000951 | 0.000005 | 0.282690 | 0.000010 | -2.88 | 4.37 | 794 | 1064 | -0.97 | 0.57 | 725 | -455 |
| X3SS14-07 | 334 | 0.037226 | 0.000163 | 0.001402 | 0.000016 | 0.282635 | 0.000011 | -4.83 | 2.21 | 882 | 1197 | -0.96 | 0.61 | 863 | -548 |
| X3SS14-08 | 323.8 | 0.031329 | 0.000101 | 0.001159 | 0.000002 | 0.282708 | 0.000010 | -2.25 | 4.62 | 774 | 1036 | -0.97 | 0.54 | 713 | -450 |
| X3SS14-09 | 335.8 | 0.037852 | 0.000078 | 0.001280 | 0.000006 | 0.282707 | 0.000010 | -2.30 | 4.80 | 778 | 1034 | -0.96 | 0.49 | 699 | -442 |
| X3SS14-10 | 327.1 | 0.025919 | 0.000057 | 0.000936 | 0.000004 | 0.282674 | 0.000010 | -3.46 | 3.53 | 817 | 1108 | -0.97 | 0.56 | 781 | -490 |
| X3SS14-11 | 327.8 | 0.037022 | 0.000152 | 0.001336 | 0.000002 | 0.282697 | 0.000012 | -2.65 | 4.27 | 793 | 1062 | -0.96 | 0.52 | 734 | -465 |
| X3SS14-12 | 330.5 | 0.028245 | 0.000046 | 0.001003 | 0.000004 | 0.282734 | 0.000012 | -1.34 | 5.72 | 734 | 972 | -0.97 | 0.55 | 642 | -403 |
| X3SS14-14 | 339.5 | 0.032555 | 0.000137 | 0.001077 | 0.000006 | 0.282671 | 0.000010 | -3.58 | 3.64 | 825 | 1110 | -0.97 | 0.89 | 771 | -485 |
| X3SS14-15 | 334.8 | 0.035983 | 0.000165 | 0.001346 | 0.000008 | 0.282591 | 0.000012 | -6.39 | 0.67 | 944 | 1295 | -0.96 | 0.74 | 960 | -609 |
| X3SS14-16 | 331.3 | 0.030523 | 0.000073 | 0.001099 | 0.000001 | 0.282704 | 0.000009 | -2.39 | 4.65 | 778 | 1040 | -0.97 | 0.52 | 709 | -447 |
| X3SS14-17 | 327.9 | 0.035402 | 0.000159 | 0.001285 | 0.000008 | 0.282694 | 0.000009 | -2.75 | 4.18 | 796 | 1067 | -0.96 | 0.60 | 740 | -468 |
| X3SS14-18 | 336.6 | 0.038403 | 0.000134 | 0.001379 | 0.000007 | 0.282687 | 0.000011 | -3.01 | 4.09 | 808 | 1080 | -0.96 | 0.62 | 743 | -472 |
| X3SS14-19 | 336.8 | 0.055334 | 0.000305 | 0.001902 | 0.000013 | 0.282677 | 0.000011 | -3.36 | 3.63 | 834 | 1109 | -0.94 | 0.61 | 772 | -497 |
| X3SS14-20 | 337.8 | 0.041054 | 0.000252 | 0.001324 | 0.000005 | 0.282709 | 0.000011 | -2.22 | 4.91 | 776 | 1029 | -0.96 | 0.86 | 691 | -438 |
| K-feldspar granite X3SS34 | |  |  |  |  |  |  |  |  |  |  |  |  |  |  |
| X3SS34-01 | 301.3 | 0.205192 | 0.001720 | 0.006713 | 0.000092 | 0.282767 | 0.000013 | -0.16 | 5.12 | 810 | 987 | -0.80 | 0.40 | 686 | -508 |
| X3SS34-02 | 288.3 | 0.129474 | 0.001482 | 0.004137 | 0.000021 | 0.282920 | 0.000009 | 5.24 | 10.8 | 513 | 616 | -0.88 | 0.50 | 328 | -225 |
| X3SS34-03 | 296.1 | 0.255422 | 0.000968 | 0.008389 | 0.000054 | 0.282774 | 0.000011 | 0.07 | 4.94 | 843 | 995 | -0.75 | 0.66 | 699 | -547 |
| X3SS34-04 | 300 | 0.207603 | 0.003591 | 0.006664 | 0.000118 | 0.282818 | 0.000009 | 1.63 | 6.90 | 724 | 873 | -0.80 | 0.69 | 573 | -424 |
| X3SS34-05 | 294.2 | 0.247987 | 0.001208 | 0.008368 | 0.000095 | 0.282771 | 0.000012 | -0.05 | 4.79 | 848 | 1003 | -0.75 | 0.43 | 709 | -554 |
| X3SS34-06 | 285.3 | 0.122335 | 0.000860 | 0.003821 | 0.000028 | 0.282812 | 0.000010 | 1.41 | 6.96 | 674 | 858 | -0.88 | 0.37 | 573 | -389 |
| X3SS34-07 | 293.2 | 0.102699 | 0.000507 | 0.003154 | 0.000019 | 0.282878 | 0.000008 | 3.74 | 9.58 | 563 | 698 | -0.90 | 0.54 | 404 | -270 |
| X3SS34-08 | 288.3 | 0.130461 | 0.000645 | 0.003697 | 0.000017 | 0.282853 | 0.000010 | 2.85 | 8.48 | 610 | 763 | -0.89 | 0.37 | 475 | -322 |
| X3SS34-09 | 287.5 | 0.254488 | 0.002509 | 0.007543 | 0.000060 | 0.282842 | 0.000012 | 2.49 | 7.37 | 703 | 833 | -0.77 | 0.52 | 546 | -416 |
| X3SS34-10 | 282.4 | 0.150817 | 0.001263 | 0.004630 | 0.000031 | 0.282812 | 0.000010 | 1.41 | 6.76 | 690 | 869 | -0.86 | 0.51 | 586 | -408 |
| X3SS34-11 | 299.2 | 0.122375 | 0.000736 | 0.003915 | 0.000048 | 0.282812 | 0.000012 | 1.40 | 7.21 | 677 | 853 | -0.88 | 0.54 | 554 | -377 |
| X3SS34-12 | 283 | 0.152913 | 0.002295 | 0.004966 | 0.000071 | 0.282820 | 0.000009 | 1.70 | 6.99 | 684 | 854 | -0.85 | 0.55 | 571 | -401 |
| X3SS34-13 | 288.2 | 0.173931 | 0.001282 | 0.005617 | 0.000065 | 0.282812 | 0.000011 | 1.42 | 6.69 | 710 | 877 | -0.83 | 0.61 | 589 | -422 |
| X3SS34-14 | 291.7 | 0.210103 | 0.000713 | 0.007824 | 0.000036 | 0.282829 | 0.000011 | 2.00 | 6.91 | 733 | 866 | -0.76 | 0.47 | 575 | -441 |
| X3SS34-15 | 297.3 | 0.222987 | 0.001580 | 0.007100 | 0.000099 | 0.282803 | 0.000009 | 1.09 | 6.23 | 760 | 914 | -0.79 | 0.50 | 616 | -462 |
| X3SS34-16 | 290.5 | 0.269705 | 0.000708 | 0.008747 | 0.000053 | 0.282819 | 0.000009 | 1.67 | 6.38 | 772 | 899 | -0.74 | 0.58 | 608 | -482 |
| X3SS34-17 | 293.9 | 0.100528 | 0.000603 | 0.002984 | 0.000016 | 0.282842 | 0.000007 | 2.48 | 8.37 | 613 | 775 | -0.91 | 0.43 | 481 | -319 |
| X3SS34-18 | 291.5 | 0.266603 | 0.000782 | 0.008599 | 0.000052 | 0.282776 | 0.000010 | 0.16 | 4.91 | 844 | 993 | -0.74 | 0.70 | 702 | -553 |
| X3SS34-19 | 294.9 | 0.220004 | 0.002679 | 0.006857 | 0.000127 | 0.282830 | 0.000010 | 2.07 | 7.22 | 708 | 849 | -0.79 | 0.52 | 554 | -413 |
| X3SS34-20 | 300.5 | 0.117659 | 0.000938 | 0.003568 | 0.000011 | 0.282870 | 0.000009 | 3.46 | 9.36 | 582 | 717 | -0.89 | 0.37 | 417 | -281 |
| Monzonitic granite X3SS22 | |  |  |  |  |  |  |  |  |  |  |  |  |  |  |
| X3SS22-01 | 278.2 | 0.068610 | 0.000929 | 0.002149 | 0.000019 | 0.282796 | 0.000010 | 0.83 | 6.55 | 667 | 878 | -0.94 | 0.68 | 600 | -389 |
| X3SS22-03 | 281.1 | 0.046862 | 0.000394 | 0.001539 | 0.000017 | 0.282891 | 0.000009 | 4.21 | 10.1 | 519 | 654 | -0.95 | 0.44 | 373 | -238 |
| X3SS22-04 | 287.1 | 0.101812 | 0.001650 | 0.003229 | 0.000038 | 0.282798 | 0.000010 | 0.92 | 6.62 | 684 | 881 | -0.90 | 0.57 | 594 | -397 |
| X3SS22-05 | 280.8 | 0.045713 | 0.000277 | 0.001596 | 0.000016 | 0.282732 | 0.000013 | -1.40 | 4.47 | 748 | 1013 | -0.95 | 0.55 | 732 | -467 |
| X3SS22-08 | 279 | 0.067610 | 0.000413 | 0.002195 | 0.000016 | 0.282846 | 0.000009 | 2.62 | 8.35 | 594 | 765 | -0.93 | 0.43 | 486 | -315 |
| X3SS22-10 | 288.6 | 0.052105 | 0.000246 | 0.001766 | 0.000010 | 0.282776 | 0.000013 | 0.15 | 6.16 | 688 | 911 | -0.95 | 0.67 | 623 | -400 |
| X3SS22-12 | 275.5 | 0.044101 | 0.000293 | 0.001542 | 0.000017 | 0.282806 | 0.000012 | 1.21 | 6.99 | 641 | 849 | -0.95 | 0.49 | 573 | -365 |
| X3SS22-13 | 278.6 | 0.052648 | 0.000321 | 0.001739 | 0.000013 | 0.282849 | 0.000009 | 2.71 | 8.51 | 583 | 754 | -0.95 | 0.48 | 475 | -305 |
| X3SS22-14 | 279 | 0.039314 | 0.000174 | 0.001305 | 0.000003 | 0.282866 | 0.000009 | 3.31 | 9.21 | 552 | 710 | -0.96 | 0.41 | 431 | -273 |
| X3SS22-15 | 280.8 | 0.039529 | 0.000417 | 0.001275 | 0.000014 | 0.282885 | 0.000009 | 3.98 | 9.92 | 525 | 666 | -0.96 | 0.77 | 385 | -244 |
| X3SS22-16 | 278.4 | 0.047367 | 0.000511 | 0.001526 | 0.000011 | 0.282810 | 0.000009 | 1.36 | 7.20 | 635 | 838 | -0.95 | 0.57 | 559 | -356 |
| X3SS22-17 | 286.8 | 0.067247 | 0.000184 | 0.002148 | 0.000003 | 0.282841 | 0.000009 | 2.43 | 8.33 | 601 | 772 | -0.94 | 0.46 | 485 | -315 |
| X3SS22-18 | 276.6 | 0.058669 | 0.000217 | 0.001884 | 0.000007 | 0.282843 | 0.000011 | 2.52 | 8.26 | 593 | 769 | -0.94 | 0.55 | 492 | -317 |
| X3SS22-19 | 281.6 | 0.060467 | 0.000281 | 0.001964 | 0.000008 | 0.282836 | 0.000011 | 2.26 | 8.08 | 605 | 784 | -0.94 | 0.85 | 502 | -324 |
| X3SS22-20 | 275.5 | 0.080279 | 0.000504 | 0.002606 | 0.000021 | 0.282819 | 0.000010 | 1.67 | 7.25 | 641 | 832 | -0.92 | 0.71 | 556 | -365 |
| X3SS22-21 | 285.8 | 0.056234 | 0.000255 | 0.001868 | 0.000007 | 0.282838 | 0.000008 | 2.33 | 8.26 | 601 | 776 | -0.94 | 0.55 | 490 | -315 |

**Notes:** The zircon U-Pb ages and Th/U ratios are derived from Du et al. (2018a, 2018b, 2019a, 2019b).

εHf(0) = 10000 × [(176Hf/177Hf)S/(176Hf/177Hf)CHUR, 0–1].

εHf(t) = 10000 × ({[(176Hf/177Hf)S - (176Lu/177Hf)S × (eλt - 1)]/[(176Hf/177Hf)CHUR, 0 - (176Lu/177Hf)CHUR × ((eλt - 1)] - 1}).

TDM = 1/λ × ln{1 + [(176Hf/177Hf)S - (176Hf/177Hf)DM]/[((176Lu/177Hf)S - (176Lu/177Hf)DM)]}.

TDMC = 1/λ × ln{1 + [(176Hf/177Hf)S, t - (176Hf/177Hf)DM, t]/[((176Lu/177Hf)C - (176Lu/177Hf)DM]} + t.

where, λ = 1.867 × 10-11/year-1 (Soderlund et al., 2004); (176Lu/177Hf)S and (176Hf/177Hf)S are the measured values of the samples; (176Lu/177Hf)CHUR = 0.0332 and (176Hf/177Hf)CHUR, 0 = 0.282772 (Blichert-Toft and Albarède, 1997); (176Lu/177Hf)DM = 0.0384 and (176Hf/177Hf)DM = 0.28325 (Griffin et al., 2004); t = zircon U-Pb age.

**Table S2. Summary of zircon U–Pb ages and Hf isotopes of the Paleozoic granitoids in the north Eastern Tianshan**

| Location | Sample No. | Rock type | Age (Ma) | Th/U | TDM | TDMC | εHf(t) | TDMC-Age | Age-TDM | Data source |
| --- | --- | --- | --- | --- | --- | --- | --- | --- | --- | --- |
| **Harlik belt** |  |  |  |  |  |  |  |  |  |  |
| Nanshankou | TS28-01 | Monzogranite | 294.0 | 1.46 | 597 | 779 | 8.35 | 485 | -303 | Chen et al., 2016 |
|  | TS28-02 |  | 294.0 | 1.47 | 506 | 611 | 11.0 | 317 | -212 |  |
|  | TS28-03 |  | 294.0 | 1.25 | 586 | 749 | 8.82 | 455 | -292 |  |
|  | TS28-04 |  | 294.0 | 1.10 | 591 | 760 | 8.64 | 466 | -297 |  |
|  | TS28-05 |  | 294.0 | 1.31 | 502 | 615 | 10.9 | 321 | -208 |  |
|  | TS28-06 |  | 294.0 | 1.11 | 559 | 702 | 9.55 | 408 | -265 |  |
|  | TS28-07 |  | 294.0 | 1.30 | 653 | 871 | 6.91 | 577 | -359 |  |
|  | TS28-08 |  | 294.0 | 2.79 | 584 | 755 | 8.73 | 461 | -290 |  |
|  | TS28-09 |  | 294.0 | 1.22 | 649 | 846 | 7.3 | 552 | -355 |  |
|  | TS28-10 |  | 294.0 | 1.01 | 600 | 778 | 8.37 | 484 | -306 |  |
|  | TS28-11 |  | 294.0 | 1.22 | 585 | 744 | 8.89 | 450 | -291 |  |
|  | TS28-12 |  | 294.0 | 1.17 | 549 | 689 | 9.76 | 395 | -255 |  |
|  | TS28-13 |  | 294.0 | 1.35 | 449 | 536 | 12.1 | 242 | -155 |  |
|  | TS28-14 |  | 294.0 | 2.57 | 619 | 807 | 7.91 | 513 | -325 |  |
|  | TS28-15 |  | 294.0 | 1.74 | 561 | 712 | 9.39 | 418 | -267 |  |
|  | TS28-16 |  | 294.0 | 0.80 | 610 | 787 | 8.23 | 493 | -316 |  |
|  | TS28-17 |  | 294.0 | 1.47 | 577 | 732 | 9.09 | 438 | -283 |  |
|  | TS28-18 |  | 294.0 | 1.37 | 646 | 843 | 7.35 | 549 | -352 |  |
|  | TS28-19 |  | 294.0 | 1.08 | 550 | 696 | 9.64 | 402 | -256 |  |
|  | TS28-20 |  | 294.0 | 1.41 | 508 | 626 | 10.7 | 332 | -214 |  |
|  | TS28-21 |  | 294.0 | 1.55 | 600 | 767 | 8.54 | 473 | -306 |  |
|  | TS28-22 |  | 294.0 | 1.35 | 533 | 668 | 10.1 | 374 | -239 |  |
|  | TS28-23 |  | 294.0 |  | 614 | 791 | 8.16 | 497 | -320 |  |
|  | TS28-24 |  | 294.0 |  | 556 | 701 | 9.57 | 407 | -262 |  |
|  | TS28-25 |  | 294.0 |  | 587 | 752 | 8.77 | 458 | -293 |  |
|  | TS28-26 |  | 294.0 |  | 593 | 753 | 8.76 | 459 | -299 |  |
|  | TS28-27 |  | 294.0 |  | 604 | 782 | 8.31 | 488 | -310 |  |
|  | TS28-28 |  | 294.0 |  | 571 | 724 | 9.22 | 430 | -277 |  |
|  | TS28-29 |  | 294.0 |  | 620 | 799 | 8.03 | 505 | -326 |  |
|  | TS28-30 |  | 294.0 |  | 631 | 825 | 7.64 | 531 | -337 |  |
| **Dananhu belt** |  |  |  |  |  |  |  |  |  |  |
| Kalatage | 14HH-1-1 | Diorite | 458.0 | 0.60 | 528 | 552 | 13.7 | 94 | -70 | Sun et al., 2019 |
|  | 14HH-1-2 |  | 451.0 | 0.77 | 486 | 499 | 14.5 | 48 | -35 |  |
|  | 14HH-1-3 |  | 449.0 | 0.68 | 520 | 542 | 13.7 | 93 | -71 |  |
|  | 14HH-1-6 |  | 454.0 | 0.50 | 488 | 500 | 14.5 | 46 | -34 |  |
|  | 14HH-1-7 |  | 453.0 | 0.62 | 492 | 505 | 14.4 | 52 | -39 |  |
|  | 14HH-1-9 |  | 449.0 | 0.57 | 506 | 523 | 14.1 | 74 | -57 |  |
|  | 14HH-1-12 |  | 454.0 | 0.50 | 533 | 559 | 13.5 | 105 | -79 |  |
|  | 14HH-1-13 |  | 452.0 | 0.34 | 556 | 580 | 13.1 | 128 | -104 |  |
|  | 14HH-1-16 |  | 450.0 | 0.46 | 471 | 479 | 14.9 | 29 | -21 |  |
|  | 14HH-1-17 |  | 451.0 | 0.37 | 551 | 585 | 13.0 | 134 | -100 |  |
|  | 14HH-1-18 |  | 453.0 | 0.59 | 510 | 533 | 13.9 | 80 | -57 |  |
|  | 14HH-1-21 |  | 457.0 | 0.55 | 541 | 564 | 13.4 | 107 | -84 |  |
|  | 14HH-5-1 | Diorite | 450.0 | 0.58 | 561 | 602 | 12.7 | 152 | -111 |  |
|  | 14HH-5-2 |  | 453.0 | 0.55 | 556 | 592 | 12.9 | 139 | -103 |  |
|  | 14HH-5-3 |  | 444.0 | 0.49 | 549 | 591 | 12.8 | 147 | -105 |  |
|  | 14HH-5-4 |  | 449.0 | 0.43 | 540 | 575 | 13.1 | 126 | -91 |  |
|  | 14HH-5-5 |  | 448.0 | 0.61 | 508 | 529 | 13.9 | 81 | -60 |  |
|  | 14HH-5-6 |  | 454.0 | 0.57 | 557 | 592 | 12.9 | 138 | -103 |  |
|  | 14HH-5-7 |  | 451.0 | 0.41 | 519 | 546 | 13.7 | 95 | -68 |  |
|  | 14HH-5-8 |  | 451.0 | 0.60 | 495 | 510 | 14.3 | 59 | -44 |  |
|  | 14HH-5-9 |  | 449.0 | 0.66 | 552 | 581 | 13.0 | 132 | -103 |  |
|  | 14HH-5-10 |  | 452.0 | 0.44 | 513 | 533 | 13.9 | 81 | -61 |  |
|  | 14HH-5-11 |  | 450.0 | 0.72 | 574 | 618 | 12.4 | 168 | -124 |  |
|  | 14HH-5-12 |  | 449.0 | 0.51 | 561 | 606 | 12.6 | 157 | -112 |  |
|  | 14HS-4-1 | Quartzdiorite | 441.0 | 0.52 | 522 | 569 | 13.4 | 128 | -81 |  |
|  | 14HS-4-2 |  | 428.0 | 0.52 | 496 | 534 | 13.8 | 106 | -68 |  |
|  | 14HS-4-3 |  | 420.0 | 0.44 | 495 | 536 | 13.7 | 116 | -75 |  |
|  | 14HS-4-4 |  | 422.0 | 0.65 | 497 | 537 | 13.7 | 115 | -75 |  |
|  | 14HS-4-5 |  | 434.0 | 0.58 | 484 | 510 | 14.2 | 76 | -50 |  |
|  | 14HS-4-6 |  | 427.0 | 0.63 | 486 | 514 | 14.1 | 87 | -59 |  |
|  | 14HS-4-7 |  | 431.0 | 0.32 | 521 | 574 | 13.2 | 143 | -90 |  |
|  | 14HS-4-8 |  | 430.0 | 0.66 | 511 | 560 | 13.4 | 130 | -81 |  |
|  | 14HS-4-9 |  | 426.0 | 0.40 | 494 | 529 | 13.8 | 103 | -68 |  |
|  | 14HS-4-10 |  | 424.0 | 0.50 | 495 | 535 | 13.7 | 111 | -71 |  |
|  | 14HS-4-12 |  | 423.0 | 0.52 | 477 | 504 | 14.2 | 81 | -54 |  |
|  | 14HS-4-13 |  | 438.0 | 0.56 | 465 | 479 | 14.8 | 41 | -27 |  |
|  | 14HH-3-2 | Granodiorite | 423.0 | 0.33 | 559 | 614 | 12.1 | 191 | -136 |  |
|  | 14HH-3-4 |  | 428.0 | 0.34 | 553 | 599 | 12.4 | 171 | -125 |  |
|  | 14HH-3-5 |  | 427.0 | 0.33 | 570 | 629 | 11.8 | 202 | -143 |  |
|  | 14HH-3-6 |  | 425.0 | 0.48 | 518 | 554 | 13.1 | 129 | -93 |  |
|  | 14HH-3-8 |  | 423.0 | 0.33 | 504 | 535 | 13.5 | 112 | -81 |  |
|  | 14HH-3-9 |  | 424.0 | 0.32 | 478 | 501 | 14.1 | 77 | -54 |  |
|  | 14HH-3-12 |  | 432.0 | 0.41 | 488 | 509 | 14.0 | 77 | -56 |  |
|  | 14HH-3-13 |  | 433.0 | 0.37 | 515 | 547 | 13.4 | 114 | -82 |  |
|  | 14HH-3-14 |  | 428.0 | 0.33 | 512 | 545 | 13.4 | 117 | -84 |  |
|  | 14HH-3-15 |  | 423.0 | 0.31 | 562 | 617 | 12.0 | 194 | -139 |  |
|  | 14HH-3-17 |  | 427.0 | 0.33 | 526 | 566 | 13.0 | 139 | -99 |  |
|  | 14HS-2-1 | Granite | 448.0 | 0.55 | 493 | 510 | 14.3 | 62 | -45 |  |
|  | 14HS-2-3 |  | 447.0 | 0.62 | 477 | 488 | 14.7 | 41 | -30 |  |
|  | 14HS-2-4 |  | 450.0 | 0.62 | 529 | 557 | 13.5 | 107 | -79 |  |
|  | 14HS-2-9 |  | 451.0 | 0.51 | 453 | 454 | 15.3 | 3 | -2 |  |
|  | 14HS-2-10 |  | 448.0 | 0.68 | 498 | 516 | 14.2 | 68 | -50 |  |
|  | 14HS-2-12 |  | 451.0 | 0.67 | 464 | 468 | 15.1 | 17 | -13 |  |
|  | 14HS-5-1 | Granite | 447.0 | 0.57 | 527 | 554 | 13.5 | 107 | -80 |  |
|  | 14HS-5-2 |  | 448.0 | 0.29 | 485 | 499 | 14.5 | 51 | -37 |  |
|  | 14HS-5-3 |  | 448.0 | 0.41 | 505 | 525 | 14.0 | 77 | -57 |  |
|  | 14HS-5-4 |  | 452.0 | 0.25 | 472 | 479 | 14.9 | 27 | -20 |  |
|  | 14HS-5-5 |  | 440.0 | 0.53 | 515 | 544 | 13.5 | 104 | -75 |  |
|  | 14HS-5-6 |  | 449.0 | 0.48 | 489 | 504 | 14.4 | 55 | -40 |  |
|  | 14HS-5-7 |  | 449.0 | 0.44 | 455 | 458 | 15.2 | 9 | -6 |  |
|  | 14HS-5-9 |  | 449.0 | 0.31 | 492 | 507 | 14.3 | 58 | -43 |  |
|  | 14HS-5-10 |  | 453.0 | 0.51 | 455 | 456 | 15.3 | 3 | -2 |  |
|  | 14HS-5-11 |  | 450.0 | 0.27 | 488 | 502 | 14.4 | 52 | -38 |  |
|  | 14HS-5-12 |  | 451.0 | 0.40 | 458 | 460 | 15.2 | 9 | -7 |  |
|  | 14DEQ-3-1 | Quartz diorite porphyry | 420.0 | 0.22 | 482 | 518 | 13.9 | 98 | -62 |  |
|  | 14DEQ-3-2 |  | 416.0 | 0.28 | 460 | 486 | 14.4 | 70 | -44 |  |
|  | 14DEQ-3-3 |  | 414.0 | 0.20 | 475 | 509 | 14.0 | 95 | -61 |  |
|  | 14DEQ-3-4 |  | 419.0 | 0.20 | 471 | 501 | 14.2 | 82 | -52 |  |
|  | 14DEQ-3-5 |  | 417.0 | 0.19 | 455 | 478 | 14.5 | 61 | -38 |  |
|  | 14DEQ-3-6 |  | 431.0 | 0.32 | 452 | 464 | 14.9 | 33 | -21 |  |
|  | 14DEQ-3-7 |  | 435.0 | 0.41 | 487 | 517 | 14.1 | 82 | -52 |  |
|  | 14DEQ-3-8 |  | 440.0 | 0.33 | 443 | 445 | 15.3 | 5 | -3 |  |
|  | 14DEQ-3-9 |  | 433.0 | 0.28 | 442 | 447 | 15.2 | 14 | -9 |  |
|  | 14DEQ-3-10 |  | 437.0 | 0.35 | 449 | 455 | 15.1 | 18 | -12 |  |
|  | 14DEQ-3-11 |  | 419.0 | 0.28 | 429 | 434 | 15.2 | 15 | -10 |  |
|  | 14DEQ-3-12 |  | 437.0 | 0.30 | 463 | 479 | 14.8 | 42 | -26 |  |
| Yuhai | S102-8-3 | Quartz diorite | 437.0 | 0.34 | 526 | 575 | 13.3 | 138 | -89 | Wang et al., 2018 |
|  | S102-8-4 |  | 436.2 | 0.30 | 435 | 434 | 15.4 | -2 | 1 |  |
|  | S102-8-6 |  | 445.0 | 0.41 | 456 | 462 | 15.1 | 17 | -11 |  |
|  | S102-8-7 |  | 455.2 | 0.32 | 447 | 442 | 15.6 | -13 | 8 |  |
|  | S102-8-8 |  | 458.2 | 0.25 | 415 | 390 | 16.4 | -68 | 43 |  |
|  | S102-8-9 |  | 433.6 | 0.38 | 476 | 502 | 14.4 | 68 | -42 |  |
|  | S102-8-12 |  | 447.6 | 0.45 | 448 | 448 | 15.4 | 0 | 0 |  |
|  | S102-8-13 |  | 449.5 | 0.44 | 453 | 455 | 15.3 | 6 | -4 |  |
|  | S102-8-14 |  | 456.1 | 0.22 | 428 | 411 | 16.0 | -45 | 28 |  |
|  | S102-8-15 |  | 443.0 | 0.52 | 528 | 576 | 13.3 | 133 | -85 |  |
|  | S102-8-16 |  | 450.4 | 0.46 | 482 | 501 | 14.6 | 51 | -32 |  |
|  | S102-8-17 |  | 434.9 | 0.34 | 488 | 518 | 14.1 | 83 | -53 |  |
|  | YH15-001-1 | Granite | 327.0 | 0.79 | 478 | 555 | 12.2 | 228 | -151 |  |
|  | YH15-001-2 |  | 321.0 | 2.18 | 361 | 383 | 14.9 | 62 | -40 |  |
|  | YH15-001-3 |  | 320.7 | 1.49 | 534 | 627 | 11.0 | 306 | -213 |  |
|  | YH15-001-4 |  | 327.0 | 0.82 | 440 | 496 | 13.2 | 169 | -113 |  |
|  | YH15-001-5 |  | 321.0 | 0.87 | 451 | 522 | 12.7 | 201 | -130 |  |
|  | YH15-001-6 |  | 320.7 | 1.74 | 429 | 486 | 13.2 | 165 | -108 |  |
|  | YH15-001-7 |  | 320.5 | 0.94 | 398 | 437 | 14.0 | 117 | -78 |  |
|  | YH15-001-8 |  | 324.5 | 0.76 | 517 | 590 | 11.7 | 266 | -193 |  |
|  | YH15-001-9 |  | 328.2 | 1.92 | 416 | 466 | 13.6 | 138 | -88 |  |
|  | YH15-001-10 |  | 324.9 | 1.03 | 478 | 559 | 12.1 | 234 | -153 |  |
|  | YH15-001-11 |  | 326.0 | 1.15 | 488 | 575 | 11.9 | 249 | -162 |  |
|  | YH15-001-12 |  | 332.9 | 0.61 | 505 | 572 | 12.0 | 239 | -172 |  |
| Tuwu-Yandong | YD13-1-1 | Quartz albite porphyry | 324.2 | 1.20 | 589 | 733 | 9.42 | 409 | -265 | Xiao et al., 2017 |
|  | YD13-1-2 |  | 325.3 | 0.32 | 494 | 592 | 11.6 | 267 | -169 |  |
|  | YD13-1-3 |  | 359.0 | 0.88 | 576 | 696 | 10.4 | 337 | -217 |  |
|  | YD13-1-4 |  | 325.0 | 0.52 | 521 | 632 | 11.0 | 307 | -196 |  |
|  | YD13-1-5 |  | 325.2 | 0.97 | 600 | 750 | 9.17 | 425 | -275 |  |
|  | YD13-1-6 |  | 323.2 | 0.97 | 554 | 677 | 10.3 | 354 | -231 |  |
|  | YD13-1-7 |  | 323.4 | 0.93 | 674 | 849 | 7.61 | 526 | -351 |  |
|  | YD13-1-8 |  | 321.4 | 1.01 | 530 | 651 | 10.7 | 330 | -209 |  |
|  | YD13-1-9 |  | 324.2 | 0.64 | 603 | 748 | 9.2 | 424 | -279 |  |
|  | YD13-1-10 |  | 360.6 | 0.47 | 517 | 604 | 11.9 | 243 | -156 |  |
|  | YD13-1-11 |  | 324.9 | 0.29 | 634 | 799 | 8.41 | 474 | -309 |  |
|  | YD13-114-1 | Plagiogranite porphyry | 339.3 | 0.17 | 549 | 663 | 10.7 | 324 | -210 |  |
|  | YD13-114-2 |  | 338.0 | 0.23 | 586 | 718 | 9.82 | 380 | -248 |  |
|  | YD13-114-3 |  | 339.9 | 0.39 | 530 | 636 | 11.1 | 296 | -190 |  |
|  | YD13-114-4 |  | 340.7 | 0.26 | 527 | 635 | 11.2 | 294 | -186 |  |
|  | YD13-114-5 |  | 338.4 | 0.31 | 539 | 647 | 10.9 | 309 | -201 |  |
|  | YD13-114-6 |  | 338.9 | 0.29 | 451 | 516 | 13.0 | 177 | -112 |  |
|  | YD13-114-7 |  | 342.3 | 0.50 | 512 | 607 | 11.6 | 265 | -170 |  |
|  | YD13-114-8 |  | 341.0 | 0.69 | 477 | 555 | 12.4 | 214 | -136 |  |
|  | YD13-114-9 |  | 336.2 | 0.36 | 585 | 725 | 9.70 | 389 | -249 |  |
|  | YD13-114-10 |  | 364.4 | 0.48 | 484 | 552 | 12.7 | 188 | -120 |  |
|  | YD13-114-11 |  | 365.9 | 0.55 | 558 | 661 | 11.1 | 295 | -192 |  |
|  | YD13-114-12 |  | 338.4 | 0.32 | 633 | 800 | 8.55 | 462 | -295 |  |
|  | YD13-165-1 | Quartz porphyry | 323.9 | 1.10 | 583 | 721 | 9.61 | 397 | -259 |  |
|  | YD13-165-2 |  | 322.6 | 1.42 | 529 | 640 | 10.9 | 317 | -206 |  |
|  | YD13-165-3 |  | 323.1 | 0.93 | 573 | 715 | 9.70 | 392 | -250 |  |
|  | YD13-165-4 |  | 322.8 | 1.70 | 654 | 810 | 8.20 | 487 | -331 |  |
|  | YD13-165-5 |  | 326.8 | 1.03 | 548 | 664 | 10.5 | 337 | -221 |  |
|  | YD13-165-8 |  | 362.9 | 1.00 | 610 | 736 | 9.84 | 373 | -247 |  |
|  | YD13-165-9 |  | 325.0 | 0.38 | 548 | 668 | 10.5 | 343 | -223 |  |
|  | YD13-165-10 |  | 325.1 | 0.28 | 553 | 680 | 10.3 | 355 | -228 |  |
|  | YD13-165-15 |  | 325.5 | 0.92 | 590 | 721 | 9.63 | 396 | -265 |  |
|  | YD13-165-16 |  | 325.8 | 0.77 | 538 | 657 | 10.6 | 331 | -212 |  |
|  | YD13-165-19 |  | 325.5 | 0.40 | 658 | 817 | 8.13 | 492 | -333 |  |
| Fuxing | FX-1-01 | Plagiogranite porphyry | 332.6 | 0.30 | 318 | 310 | 16.1 | -23 | 15 | Wang et al., 2016a |
|  | FX-1-02 |  | 325.8 | 0.51 | 390 | 428 | 14.2 | 102 | -64 |  |
|  | FX-1-03 |  | 328.1 | 0.27 | 304 | 290 | 16.4 | -38 | 24 |  |
|  | FX-1-04 |  | 328.9 | 0.41 | 289 | 266 | 16.8 | -63 | 40 |  |
|  | FX-1-05 |  | 334.5 | 0.35 | 376 | 400 | 14.7 | 66 | -42 |  |
|  | FX-1-06 |  | 334.0 | 0.26 | 238 | 186 | 18.1 | -148 | 96 |  |
|  | FX-1-07 |  | 332.0 | 0.35 | 348 | 356 | 15.4 | 24 | -16 |  |
|  | FX-1-08 |  | 342.2 | 0.36 | 265 | 221 | 17.6 | -121 | 77 |  |
|  | FX-1-09 |  | 330.9 | 0.33 | 359 | 376 | 15.1 | 45 | -28 |  |
|  | FX-1-10 |  | 331.9 | 0.32 | 403 | 445 | 14.0 | 113 | -71 |  |
|  | FX-1-11 |  | 332.8 | 0.37 | 323 | 318 | 16.0 | -15 | 10 |  |
|  | FX-1-12 |  | 333.1 | 0.27 | 320 | 313 | 16.1 | -20 | 13 |  |
|  | FX-1-13 |  | 325.2 | 0.18 | 320 | 317 | 15.9 | -8 | 5 |  |
|  | FX-1-14 |  | 334.2 | 0.45 | 227 | 169 | 18.3 | -165 | 107 |  |
|  | FX-1-15 |  | 334.6 | 0.36 | 309 | 295 | 16.4 | -40 | 26 |  |
|  | FX-3-01 | Monzogranite | 329.9 | 0.46 | 400 | 441 | 14.1 | 111 | -70 |  |
|  | FX-3-02 |  | 318.7 | 0.38 | 379 | 414 | 14.3 | 95 | -60 |  |
|  | FX-3-03 |  | 322.4 | 0.44 | 508 | 605 | 11.4 | 283 | -186 |  |
|  | FX-3-04 |  | 324.5 | 0.48 | 453 | 526 | 12.7 | 202 | -129 |  |
|  | FX-3-05 |  | 332.5 | 0.34 | 400 | 439 | 14.1 | 107 | -68 |  |
|  | FX-3-06 |  | 342.8 | 0.41 | 470 | 541 | 12.7 | 198 | -127 |  |
|  | FX-3-07 |  | 328.5 | 0.35 | 417 | 469 | 13.6 | 141 | -89 |  |
|  | FX-3-08 |  | 329.9 | 0.39 | 458 | 531 | 12.6 | 201 | -128 |  |
|  | FX-3-09 |  | 337.2 | 0.46 | 475 | 553 | 12.4 | 216 | -138 |  |
|  | FX-3-10 |  | 332.7 | 0.41 | 413 | 459 | 13.8 | 126 | -80 |  |
|  | FX-3-11 |  | 322.2 | 0.39 | 405 | 453 | 13.8 | 131 | -83 |  |
|  | FX-3-12 |  | 329.9 | 0.28 | 401 | 442 | 14.0 | 112 | -71 |  |
|  | FX-3-13 |  | 329.3 | 0.32 | 438 | 498 | 13.2 | 169 | -109 |  |
|  | FX-3-14 |  | 326.0 | 0.47 | 473 | 554 | 12.2 | 228 | -147 |  |
|  | FX-3-15 |  | 325.2 | 0.47 | 394 | 434 | 14.1 | 109 | -69 |  |
| Yuhai | 14YH-2-01 | Diorite | 441.0 | 0.39 | 464 | 478 | 14.8 | 37 | -23 | Wang et al., 2016b |
|  | 14YH-2-02 |  | 441.0 | 0.30 | 474 | 493 | 14.6 | 52 | -33 |  |
|  | 14YH-2-03 |  | 442.0 | 0.42 | 382 | 348 | 16.9 | -94 | 60 |  |
|  | 14YH-2-04 |  | 445.0 | 0.28 | 389 | 357 | 16.7 | -88 | 56 |  |
|  | 14YH-2-05 |  | 442.0 | 0.45 | 389 | 358 | 16.7 | -84 | 53 |  |
|  | 14YH-2-07 |  | 441.0 | 0.38 | 388 | 356 | 16.7 | -85 | 53 |  |
|  | 14YH-2-08 |  | 442.0 | 0.35 | 322 | 256 | 18.3 | -186 | 120 |  |
|  | 14YH-2-09 |  | 442.0 | 0.32 | 412 | 394 | 16.1 | -48 | 30 |  |
|  | 14YH-2-10 |  | 442.0 | 0.28 | 359 | 311 | 17.4 | -131 | 83 |  |
|  | 14YH-2-11 |  | 440.0 | 0.38 | 406 | 386 | 16.2 | -54 | 34 |  |
|  | 14YH-2-12 |  | 440.0 | 0.34 | 516 | 559 | 13.5 | 119 | -76 |  |
|  | 14YH-2-13 |  | 442.0 | 0.42 | 310 | 234 | 18.6 | -208 | 132 |  |
|  | 14YH-2-14 |  | 442.0 | 0.30 | 543 | 600 | 12.9 | 158 | -101 |  |
|  | 14YH-2-15 |  | 440.0 | 0.32 | 432 | 427 | 15.6 | -13 | 8 |  |
|  | 14YH-2-16 |  | 442.0 | 0.25 | 449 | 452 | 15.2 | 10 | -7 |  |
|  | 14YH-2-17 |  | 442.0 | 0.30 | 425 | 415 | 15.8 | -27 | 17 |  |
|  | 14YH-2-18 |  | 442.0 | 0.31 | 594 | 681 | 11.7 | 239 | -152 |  |
|  | 14YH-2-19 |  | 442.0 | 0.35 | 551 | 612 | 12.7 | 170 | -109 |  |
|  | 14YH-2-20 |  | 441.0 | 0.39 | 714 | 872 | 8.70 | 431 | -273 |  |
|  | 14YH-2-21 |  | 440.0 | 0.47 | 484 | 509 | 14.3 | 69 | -44 |  |
|  | 14YH-2-22 |  | 441.0 | 0.41 | 361 | 313 | 17.4 | -128 | 80 |  |
|  | 14YH-2-23 |  | 443.0 | 0.36 | 344 | 287 | 17.8 | -156 | 99 |  |
|  | 14YH-2-24 |  | 443.0 | 0.39 | 375 | 336 | 17.1 | -107 | 68 |  |
|  | 14YH-2-25 |  | 443.0 | 0.53 | 622 | 724 | 11.0 | 281 | -179 |  |
|  | 14YH-01-02 | Granodiorite | 430.0 | 0.43 | 398 | 378 | 16.2 | -52 | 32 |  |
|  | 14YH-01-03 |  | 431.0 | 0.51 | 343 | 293 | 17.6 | -138 | 88 |  |
|  | 14YH-01-04 |  | 432.0 | 0.51 | 407 | 392 | 16.0 | -40 | 25 |  |
|  | 14YH-01-05 |  | 432.0 | 0.42 | 483 | 514 | 14.2 | 82 | -51 |  |
|  | 14YH-01-06 |  | 432.0 | 0.33 | 545 | 612 | 12.6 | 180 | -113 |  |
|  | 14YH-01-07 |  | 431.0 | 0.36 | 480 | 509 | 14.2 | 78 | -49 |  |
|  | 14YH-01-08 |  | 431.0 | 0.23 | 394 | 373 | 16.3 | -58 | 37 |  |
|  | 14YH-01-09 |  | 430.0 | 0.29 | 406 | 392 | 16.0 | -38 | 24 |  |
|  | 14YH-01-10 |  | 427.0 | 0.26 | 321 | 260 | 18.0 | -167 | 106 |  |
|  | 14YH-01-11 |  | 430.0 | 0.40 | 512 | 561 | 13.4 | 131 | -82 |  |
|  | 14YH-01-15 |  | 430.0 | 0.28 | 443 | 451 | 15.1 | 21 | -13 |  |
|  | 14YH-01-16 |  | 430.0 | 0.46 | 503 | 546 | 13.6 | 116 | -73 |  |
|  | 14YH-01-17 |  | 430.0 | 0.27 | 436 | 441 | 15.2 | 11 | -6 |  |
|  | 14YH-01-18 |  | 427.0 | 0.25 | 446 | 456 | 15.0 | 29 | -19 |  |
|  | 14YH-01-19 |  | 428.0 | 0.25 | 435 | 438 | 15.3 | 10 | -7 |  |
|  | 14YH-01-20 |  | 431.0 | 0.31 | 374 | 342 | 16.8 | -89 | 57 |  |
|  | 14YH-01-21 |  | 431.0 | 0.40 | 425 | 422 | 15.6 | -9 | 6 |  |
|  | 14YH-01-22 |  | 431.0 | 0.41 | 318 | 213 | 19.6 | -218 | 113 |  |
|  | 14YH-02-01 | Granodiorite | 432.0 | 0.35 | 501 | 543 | 13.7 | 111 | -69 |  |
|  | 14YH-02-02 |  | 431.0 | 0.27 | 331 | 273 | 17.9 | -158 | 100 |  |
|  | 14YH-02-03 |  | 431.0 | 0.42 | 384 | 357 | 16.6 | -74 | 47 |  |
|  | 14YH-02-04 |  | 429.0 | 0.37 | 410 | 398 | 15.9 | -31 | 19 |  |
|  | 14YH-02-05 |  | 432.0 | 0.32 | 501 | 540 | 13.7 | 108 | -69 |  |
|  | 14YH-02-06 |  | 431.0 | 0.44 | 409 | 396 | 16.0 | -35 | 22 |  |
|  | 14YH-02-07 |  | 432.0 | 0.26 | 404 | 388 | 16.1 | -44 | 28 |  |
|  | 14YH-02-08 |  | 423.0 | 0.26 | 477 | 510 | 14.1 | 87 | -54 |  |
|  | 14YH-02-10 |  | 430.0 | 0.27 | 544 | 611 | 12.6 | 181 | -114 |  |
|  | 14YH-02-11 |  | 430.0 | 0.31 | 385 | 358 | 16.6 | -72 | 45 |  |
|  | 14YH-02-12 |  | 430.0 | 0.27 | 508 | 554 | 13.5 | 124 | -78 |  |
|  | 14YH-02-13 |  | 430.0 | 0.30 | 289 | 209 | 18.9 | -221 | 141 |  |
|  | 14YH-02-14 |  | 430.0 | 0.45 | 443 | 451 | 15.1 | 21 | -13 |  |
|  | 14YH-02-15 |  | 430.0 | 0.42 | 432 | 433 | 15.4 | 3 | -2 |  |
|  | 14YH-02-16 |  | 430.0 | 0.23 | 404 | 389 | 16.1 | -41 | 26 |  |
|  | 14YH-02-17 |  | 432.0 | 0.35 | 405 | 390 | 16.1 | -42 | 27 |  |
|  | 14YH-02-18 |  | 431.0 | 0.23 | 378 | 348 | 16.7 | -83 | 53 |  |
|  | 14YH-02-19 |  | 429.0 | 0.29 | 375 | 344 | 16.8 | -85 | 54 |  |
|  | 14YH-02-20 |  | 430.0 | 0.28 | 437 | 441 | 15.3 | 11 | -7 |  |
|  | 14YH-02-21 |  | 430.0 | 0.30 | 379 | 350 | 16.7 | -80 | 51 |  |
|  | 14YH-02-22 |  | 431.0 | 0.31 | 423 | 417 | 15.6 | -14 | 8 |  |
|  | 14YH-02-23 |  | 431.0 | 0.48 | 511 | 557 | 13.5 | 126 | -80 |  |
|  | 14YH-02-24 |  | 429.0 | 0.29 | 313 | 247 | 18.3 | -182 | 116 |  |
|  | 14YH-02-25 |  | 433.0 | 0.46 | 366 | 327 | 17.1 | -106 | 67 |  |
| Chihu | CH-9-01 | Granodiorite | 319.7 | 0.62 | 435 | 503 | 13.0 | 183 | -115 | Zhang et al., 2016a |
|  | CH-9-02 |  | 326.0 | 1.12 | 362 | 383 | 14.9 | 57 | -36 |  |
|  | CH-9-03 |  | 311.8 | 0.57 | 417 | 477 | 13.3 | 165 | -105 |  |
|  | CH-9-04 |  | 320.9 | 0.73 | 485 | 580 | 11.8 | 259 | -164 |  |
|  | CH-9-05 |  | 321.0 | 0.70 | 425 | 485 | 13.3 | 164 | -104 |  |
|  | CH-9-06 |  | 327.5 | 0.65 | 465 | 544 | 12.4 | 217 | -138 |  |
|  | CH-9-07 |  | 325.7 | 1.06 | 481 | 570 | 12.0 | 244 | -155 |  |
|  | CH-9-08 |  | 322.6 | 0.70 | 437 | 504 | 13.0 | 181 | -114 |  |
|  | CH-9-09 |  | 314.9 | 0.81 | 491 | 594 | 11.5 | 279 | -176 |  |
|  | CH-9-10 |  | 315.7 | 0.98 | 474 | 567 | 11.9 | 251 | -158 |  |
|  | CH-9-11 |  | 318.7 | 0.67 | 409 | 462 | 13.6 | 143 | -90 |  |
|  | CH-9-12 |  | 316.9 | 0.59 | 409 | 463 | 13.5 | 146 | -92 |  |
|  | CH-9-13 |  | 316.7 | 0.66 | 453 | 534 | 12.4 | 217 | -136 |  |
|  | CH-9-14 |  | 322.3 | 0.71 | 390 | 430 | 14.1 | 108 | -68 |  |
|  | CH-9-15 |  | 326.2 | 1.18 | 376 | 404 | 14.6 | 78 | -50 |  |
|  | CH001-12-02 | Porphyritic granodiorite | 308.1 | 0.58 | 388 | 434 | 13.9 | 126 | -80 |  |
|  | CH001-12-03 |  | 313.2 | 0.37 | 373 | 408 | 14.4 | 95 | -60 |  |
|  | CH001-12-04 |  | 310.4 | 0.44 | 436 | 509 | 12.8 | 199 | -126 |  |
|  | CH001-12-05 |  | 315.5 | 0.42 | 304 | 297 | 16.1 | -19 | 12 |  |
|  | CH001-12-06 |  | 324.5 | 0.42 | 351 | 366 | 15.1 | 42 | -27 |  |
|  | CH001-12-07 |  | 314.9 | 0.46 | 384 | 424 | 14.1 | 109 | -69 |  |
|  | CH001-12-08 |  | 313.0 | 0.39 | 319 | 323 | 15.7 | 10 | -6 |  |
|  | CH001-12-09 |  | 313.7 | 0.60 | 313 | 313 | 15.8 | -1 | 1 |  |
|  | CH001-12-10 |  | 316.9 | 0.37 | 314 | 312 | 15.9 | -5 | 3 |  |
|  | CH001-12-11 |  | 311.1 | 0.41 | 266 | 240 | 17.0 | -71 | 45 |  |
|  | CH001-12-12 |  | 312.2 | 0.40 | 380 | 420 | 14.2 | 108 | -68 |  |
|  | CH001-12-13 |  | 320.2 | 0.50 | 264 | 232 | 17.2 | -88 | 56 |  |
|  | CH001-12-14 |  | 316.0 | 0.49 | 371 | 403 | 14.5 | 87 | -55 |  |
| Yandong | YD13-31-1 | Granodiorite | 420.0 | 0.68 | 602 | 710 | 10.9 | 290 | -182 | Xiao et al., 2015 |
|  | YD13-31-2 |  | 420.1 | 0.73 | 632 | 757 | 10.2 | 337 | -212 |  |
|  | YD13-31-3 |  | 423.3 | 0.52 | 619 | 736 | 10.6 | 313 | -196 |  |
|  | YD13-31-4 |  | 421.3 | 0.60 | 574 | 667 | 11.6 | 246 | -153 |  |
|  | YD13-31-5 |  | 420.7 | 0.59 | 603 | 710 | 11.0 | 289 | -182 |  |
|  | YD13-31-6 |  | 418.9 | 0.58 | 613 | 730 | 10.6 | 311 | -194 |  |
|  | YD13-31-7 |  | 419.7 | 0.74 | 605 | 711 | 10.9 | 291 | -185 |  |
|  | YD13-31-8 |  | 425.3 | 0.54 | 687 | 844 | 8.91 | 419 | -262 |  |
|  | YD13-31-9 |  | 422.3 | 0.73 | 632 | 758 | 10.2 | 336 | -210 |  |
|  | YD13-31-10 |  | 421.4 | 0.61 | 576 | 669 | 11.6 | 248 | -155 |  |
|  | YD13-31-11 |  | 429.5 | 0.76 | 582 | 671 | 11.7 | 242 | -153 |  |
|  | YD13-31-12 |  | 418.2 | 0.73 | 653 | 788 | 9.70 | 370 | -235 |  |
| Sidingheishan | SH-11-1 | Granite | 397.3 | 0.76 | 501 | 558 | 13.0 | 161 | -104 | Su et al., 2011 |
|  | SH-11-2 |  | 399.5 | 0.66 | 424 | 438 | 14.9 | 39 | -25 |  |
|  | SH-11-3 |  | 398.1 | 0.70 | 473 | 515 | 13.7 | 117 | -75 |  |
|  | SH-11-4 |  | 382.1 | 0.44 | 476 | 524 | 13.7 | 142 | -94 |  |
|  | SH-11-5 |  | 395.8 | 0.72 | 539 | 618 | 12.1 | 222 | -143 |  |
|  | SH-11-6 |  | 385.5 | 0.88 | 464 | 506 | 13.9 | 121 | -79 |  |
|  | SH-11-7 |  | 403.0 | 0.80 | 462 | 495 | 14.0 | 92 | -59 |  |
|  | SH-11-8 |  | 398.0 | 0.75 | 460 | 494 | 14.0 | 96 | -62 |  |
|  | SH-11-9 |  | 402.2 | 0.70 | 448 | 471 | 14.3 | 69 | -46 |  |
|  | SH-11-11 |  | 406.3 | 0.58 | 449 | 356 | 14.3 | -50 | -43 |  |
|  | SH-11-12 |  | 403.4 | 0.66 | 461 | 473 | 14.0 | 70 | -58 |  |
|  | SH-11-13 |  | 400.0 | 0.66 | 350 | 493 | 16.7 | 93 | 50 |  |
|  | SH-11-14 |  | 399.8 | 0.54 | 492 | 323 | 13.2 | -77 | -92 |  |
|  | SH-11-15 |  | 398.9 | 0.85 | 457 | 543 | 14.1 | 144 | -58 |  |
|  | SH-11-16 |  | 398.6 | 0.88 | 386 | 488 | 15.8 | 89 | 13 |  |
|  | SH-R-1 | Granite | 440.0 | 0.62 | 437 | 434 | 15.5 | -6 | 3 |  |
|  | SH-R-2 |  | 432.0 | 0.63 | 463 | 479 | 14.9 | 47 | -31 |  |
|  | SH-R-3 |  | 432.0 | 0.59 | 448 | 456 | 15.2 | 24 | -16 |  |
|  | SH-R-4 |  | 447.0 | 0.77 | 498 | 525 | 14.0 | 78 | -51 |  |
|  | SH-R-5 |  | 441.0 | 0.42 | 469 | 482 | 14.7 | 41 | -28 |  |
|  | SH-R-6 |  | 440.0 | 0.60 | 374 | 340 | 17.0 | -100 | 66 |  |
|  | SH-R-7 |  | 435.0 | 0.46 | 443 | 446 | 15.4 | 11 | -8 |  |
|  | SH-R-8 |  | 437.0 | 0.69 | 404 | 388 | 16.2 | -49 | 33 |  |
|  | SH-R-9 |  | 419.0 | 0.34 | 558 | 637 | 12.5 | 218 | -139 |  |
|  | SH-R-10 |  | 440.0 | 0.57 | 507 | 539 | 13.8 | 99 | -67 |  |
|  | SH-R-11 |  | 435.0 | 0.54 | 488 | 517 | 14.3 | 82 | -53 |  |
|  | SH-R-12 |  | 478.0 | 0.53 | 520 | 542 | 13.5 | 64 | -42 |  |
|  | SH-R-13 |  | 432.0 | 0.71 | 395 | 374 | 16.5 | -58 | 37 |  |
|  | SH-R-14 |  | 450.0 | 0.79 | 574 | 638 | 12.2 | 188 | -124 |  |
|  | SH-R-15 |  | 427.0 | 0.64 | 500 | 539 | 14.0 | 112 | -73 |  |
|  | SH-R-16 |  | 436.0 | 0.65 | 510 | 543 | 13.8 | 107 | -74 |  |
| **Kangguer belt** |  |  |  |  |  |  |  |  |  |  |
| Baishan | BSD-9-1 | Biotite granite | 294.0 | 0.31 | 596 | 782 | 8.30 | 488 | -302 | Cao et al., 2017 |
|  | BSD-9-2 |  | 294.0 | 0.29 | 440 | 529 | 12.2 | 235 | -146 |  |
|  | BSD-9-3 |  | 294.0 | 0.34 | 568 | 736 | 9.00 | 442 | -274 |  |
|  | BSD-9-4 |  | 294.0 | 0.37 | 608 | 798 | 8.00 | 504 | -314 |  |
|  | BSD-9-5 |  | 294.0 | 0.29 | 607 | 792 | 8.10 | 498 | -313 |  |
|  | BSD-9-6 |  | 294.0 | 0.33 | 617 | 812 | 7.80 | 518 | -323 |  |
|  | BSD-9-7 |  | 294.0 | 0.32 | 660 | 879 | 6.80 | 585 | -366 |  |
|  | BSD-9-8 |  | 294.0 | 0.36 | 515 | 648 | 10.4 | 354 | -221 |  |
|  | BSD-9-9 |  | 294.0 | 0.35 | 715 | 964 | 5.40 | 670 | -421 |  |
|  | BSD-9-10 |  | 294.0 | 0.37 | 489 | 605 | 11.1 | 311 | -195 |  |
|  | BSD-9-11 |  | 294.0 | 0.24 | 559 | 716 | 9.30 | 422 | -265 |  |
|  | BSD-9-12 |  | 294.0 | 0.31 | 561 | 720 | 9.30 | 426 | -267 |  |
|  | BSD-9-13 |  | 294.0 | 0.34 | 564 | 725 | 9.20 | 431 | -270 |  |
|  | BSD-9-14 |  | 294.0 | 0.27 | 704 | 933 | 5.90 | 639 | -410 |  |
|  | BSD-9-15 |  | 294.0 | 0.36 | 615 | 808 | 7.90 | 514 | -321 |  |
|  | BSD-9-16 |  | 294.0 | 0.37 | 606 | 795 | 8.10 | 501 | -312 |  |
|  | BSD-9-17 |  | 294.0 | 0.47 | 589 | 760 | 8.60 | 466 | -295 |  |
|  | BSD-9-18 |  | 294.0 | 0.33 | 551 | 704 | 9.50 | 410 | -257 |  |
|  | BSD-9-19 |  | 294.0 | 0.28 | 548 | 701 | 9.50 | 407 | -254 |  |
|  | BSD-9-20 |  | 294.0 | 0.38 | 673 | 875 | 6.80 | 581 | -379 |  |
|  | BSD-9-21 |  | 294.0 |  | 582 | 753 | 8.70 | 459 | -288 |  |
|  | BSD-9-22 |  | 294.0 |  | 586 | 764 | 8.60 | 470 | -292 |  |
|  | BSD-9-23 |  | 294.0 |  | 696 | 910 | 6.30 | 616 | -402 |  |
|  | BSD-9-24 |  | 294.0 |  | 575 | 743 | 8.90 | 449 | -281 |  |
|  | BSD-9-25 |  | 294.0 |  | 568 | 731 | 9.10 | 437 | -274 |  |
|  | BSD-9-26 |  | 294.0 |  | 792 | 1060 | 3.90 | 766 | -498 |  |
|  | BSD-9-27 |  | 294.0 |  | 630 | 822 | 7.60 | 528 | -336 |  |
|  | BSD-13-1 | Biotite granite | 293.0 | 0.23 | 715 | 956 | 5.50 | 663 | -422 |  |
|  | BSD-13-2 |  | 293.0 | 0.21 | 743 | 1002 | 4.80 | 709 | -450 |  |
|  | BSD-13-3 |  | 293.0 | 0.20 | 729 | 979 | 5.20 | 686 | -436 |  |
|  | BSD-13-4 |  | 293.0 | 0.23 | 656 | 864 | 7.00 | 571 | -363 |  |
|  | BSD-13-5 |  | 293.0 | 0.20 | 655 | 860 | 7.10 | 567 | -362 |  |
|  | BSD-13-6 |  | 293.0 | 0.21 | 678 | 900 | 6.40 | 607 | -385 |  |
|  | BSD-13-7 |  | 293.0 | 0.20 | 715 | 957 | 5.50 | 664 | -422 |  |
|  | BSD-13-8 |  | 293.0 | 0.22 | 625 | 818 | 7.70 | 525 | -332 |  |
|  | BSD-13-9 |  | 293.0 | 0.21 | 719 | 960 | 5.50 | 667 | -426 |  |
|  | BSD-13-10 |  | 293.0 | 0.31 | 599 | 775 | 8.40 | 482 | -306 |  |
|  | BSD-13-11 |  | 293.0 | 0.21 | 549 | 701 | 9.50 | 408 | -256 |  |
|  | BSD-13-12 |  | 293.0 | 0.17 | 489 | 607 | 11.0 | 314 | -196 |  |
|  | BSD-13-13 |  | 293.0 |  | 692 | 918 | 6.10 | 625 | -399 |  |
|  | BSD-13-14 |  | 293.0 |  | 670 | 891 | 6.60 | 598 | -377 |  |
|  | BSD-13-15 |  | 293.0 |  | 683 | 903 | 6.40 | 610 | -390 |  |
|  | BSD-13-16 |  | 293.0 |  | 737 | 994 | 4.90 | 701 | -444 |  |
|  | BSD-13-17 |  | 293.0 |  | 636 | 839 | 7.40 | 546 | -343 |  |
|  | BSD-13-18 |  | 293.0 |  | 652 | 860 | 7.00 | 567 | -359 |  |
|  | BSD-13-19 |  | 293.0 |  | 632 | 837 | 7.40 | 544 | -339 |  |
|  | BSD-13-20 |  | 293.0 |  | 730 | 980 | 5.20 | 687 | -437 |  |
|  | BSD-13-21 |  | 293.0 |  | 777 | 1058 | 3.90 | 765 | -484 |  |
|  | BSD-13-22 |  | 293.0 |  | 602 | 779 | 8.30 | 486 | -309 |  |
|  | BSD-13-23 |  | 293.0 |  | 617 | 805 | 7.90 | 512 | -324 |  |
|  | BSD-13-24 |  | 293.0 |  | 644 | 846 | 7.30 | 553 | -351 |  |
|  | BS-16-1 | Biotite granite | 293.0 | 0.26 | 735 | 988 | 5.00 | 695 | -442 |  |
|  | BS-16-2 |  | 293.0 | 0.21 | 672 | 892 | 6.60 | 599 | -379 |  |
|  | BS-16-3 |  | 293.0 | 0.20 | 768 | 1038 | 4.30 | 745 | -475 |  |
|  | BS-16-4 |  | 293.0 | 0.18 | 654 | 861 | 7.00 | 568 | -361 |  |
|  | BS-16-5 |  | 293.0 | 0.19 | 593 | 768 | 8.50 | 475 | -300 |  |
|  | BS-16-6 |  | 293.0 | 0.24 | 643 | 844 | 7.30 | 551 | -350 |  |
|  | BS-16-7 |  | 293.0 | 0.18 | 685 | 911 | 6.30 | 618 | -392 |  |
|  | BS-16-8 |  | 293.0 | 0.22 | 708 | 949 | 5.60 | 656 | -415 |  |
|  | BS-16-9 |  | 293.0 | 0.17 | 717 | 961 | 5.50 | 668 | -424 |  |
|  | BS-16-10 |  | 293.0 | 0.19 | 699 | 933 | 5.90 | 640 | -406 |  |
|  | BS-16-11 |  | 293.0 | 0.18 | 529 | 667 | 10.1 | 374 | -236 |  |
|  | BS-16-12 |  | 293.0 |  | 686 | 908 | 6.30 | 615 | -393 |  |
|  | BS-16-13 |  | 293.0 |  | 759 | 1029 | 4.40 | 736 | -466 |  |
|  | BS-16-14 |  | 293.0 |  | 585 | 757 | 8.70 | 464 | -292 |  |
|  | BS-16-15 |  | 293.0 |  | 687 | 914 | 6.20 | 621 | -394 |  |
|  | BS-16-16 |  | 293.0 |  | 727 | 971 | 5.30 | 678 | -434 |  |
|  | BS-16-17 |  | 293.0 |  | 556 | 709 | 9.40 | 416 | -263 |  |
|  | BS-16-18 |  | 293.0 |  | 719 | 959 | 5.50 | 666 | -426 |  |
|  | BS-16-19 |  | 293.0 |  | 519 | 648 | 10.4 | 355 | -226 |  |
|  | BS-16-20 |  | 293.0 |  | 737 | 992 | 5.00 | 699 | -444 |  |
|  | BS-16-21 |  | 293.0 |  | 545 | 696 | 9.60 | 403 | -252 |  |
|  | BS-16-22 |  | 293.0 |  | 629 | 823 | 7.60 | 530 | -336 |  |
|  | BS-16-23 |  | 293.0 |  | 633 | 825 | 7.60 | 532 | -340 |  |
|  | BS-17-1 | Biotite granite | 292.0 | 0.36 | 629 | 824 | 7.60 | 532 | -337 |  |
|  | BS-17-2 |  | 292.0 | 0.30 | 801 | 1095 | 3.40 | 803 | -509 |  |
|  | BS-17-3 |  | 292.0 | 0.32 | 655 | 866 | 6.90 | 574 | -363 |  |
|  | BS-17-4 |  | 292.0 | 0.21 | 812 | 1096 | 3.30 | 804 | -520 |  |
|  | BS-17-5 |  | 292.0 | 0.57 | 686 | 915 | 6.20 | 623 | -394 |  |
|  | BS-17-6 |  | 292.0 | 0.48 | 668 | 886 | 6.60 | 594 | -376 |  |
|  | BS-17-7 |  | 292.0 | 0.25 | 575 | 743 | 8.90 | 451 | -283 |  |
|  | BS-17-8 |  | 292.0 | 0.39 | 543 | 696 | 9.60 | 404 | -251 |  |
|  | BS-17-9 |  | 292.0 | 0.75 | 689 | 919 | 6.10 | 627 | -397 |  |
|  | BS-17-10 |  | 292.0 | 0.21 | 594 | 767 | 8.50 | 475 | -302 |  |
|  | BS-17-11 |  | 292.0 | 0.48 | 728 | 978 | 5.20 | 686 | -436 |  |
|  | BS-17-12 |  | 292.0 | 0.35 | 726 | 975 | 5.20 | 683 | -434 |  |
|  | BS-17-13 |  | 292.0 | 0.66 | 650 | 852 | 7.20 | 560 | -358 |  |
|  | BS-17-14 |  | 292.0 | 0.29 | 633 | 838 | 7.40 | 546 | -341 |  |
|  | BS-17-15 |  | 292.0 | 0.24 | 592 | 770 | 8.40 | 478 | -300 |  |
|  | BS-17-16 |  | 292.0 | 0.25 | 693 | 932 | 5.90 | 640 | -401 |  |
|  | BS-17-17 |  | 292.0 | 0.51 | 590 | 768 | 8.50 | 476 | -298 |  |
|  | BS-17-18 |  | 292.0 | 0.37 | 671 | 890 | 6.60 | 598 | -379 |  |
|  | BS-17-19 |  | 292.0 | 0.44 | 625 | 816 | 7.70 | 524 | -333 |  |
|  | BS-17-20 |  | 292.0 |  | 561 | 719 | 9.20 | 427 | -269 |  |
|  | BS-17-21 |  | 292.0 |  | 618 | 806 | 7.90 | 514 | -326 |  |
|  | BS-17-22 |  | 292.0 |  | 648 | 849 | 7.20 | 557 | -356 |  |
|  | BS-17-23 |  | 292.0 |  | 739 | 995 | 4.90 | 703 | -447 |  |
|  | BS-17-24 |  | 292.0 |  | 660 | 865 | 7.00 | 573 | -368 |  |
|  | BS-17-25 |  | 292.0 |  | 652 | 859 | 7.00 | 567 | -360 |  |
|  | BSZK15-5-405-1 | Biotite granite | 294.0 | 0.85 | 627 | 817 | 7.70 | 523 | -333 |  |
|  | BSZK15-5-405-2 |  | 294.0 | 0.41 | 530 | 674 | 10.0 | 380 | -236 |  |
|  | BSZK15-5-405-3 |  | 294.0 | 0.43 | 557 | 709 | 9.40 | 415 | -263 |  |
|  | BSZK15-5-405-4 |  | 294.0 | 0.32 | 689 | 924 | 6.10 | 630 | -395 |  |
|  | BSZK15-5-405-5 |  | 294.0 | 0.38 | 834 | 1155 | 2.40 | 861 | -540 |  |
|  | BSZK15-5-405-6 |  | 294.0 | 0.17 | 726 | 970 | 5.30 | 676 | -432 |  |
|  | BSZK15-5-405-7 |  | 294.0 | 0.30 | 645 | 857 | 7.10 | 563 | -351 |  |
|  | BSZK15-5-405-8 |  | 294.0 | 0.95 | 650 | 856 | 7.10 | 562 | -356 |  |
|  | BSZK15-5-405-9 |  | 294.0 | 0.36 | 643 | 844 | 7.30 | 550 | -349 |  |
|  | BSZK15-5-405-10 |  | 294.0 | 0.35 | 826 | 1145 | 2.60 | 851 | -532 |  |
|  | BSZK15-5-405-11 |  | 294.0 | 0.64 | 727 | 979 | 5.20 | 685 | -433 |  |
|  | BSZK15-5-405-12 |  | 294.0 | 0.60 | 728 | 975 | 5.30 | 681 | -434 |  |
| **Yamansu belt** |  |  |  |  |  |  |  |  |  |  |
| Bailinshan | 16CXS29-01 | Diorite | 319.0 |  | 274 | 248 | 17.0 | -71 | 45 | Long et al., 2020 |
|  | 16CXS29-02 |  | 317.0 |  | 289 | 273 | 17.0 | -44 | 28 |  |
|  | 16CXS29-03 |  | 311.0 |  | 262 | 231 | 17.0 | -80 | 49 |  |
|  | 16CXS29-04 |  | 318.0 |  | 271 | 243 | 17.0 | -75 | 47 |  |
|  | 16CXS29-05 |  | 317.0 |  | 291 | 275 | 16.0 | -42 | 26 |  |
|  | 16CXS29-06 |  | 320.0 |  | 299 | 285 | 16.0 | -35 | 21 |  |
|  | 16CXS29-07 |  | 317.0 |  | 299 | 287 | 16.0 | -30 | 18 |  |
|  | 16CXS29-08 |  | 315.0 |  | 299 | 288 | 16.0 | -27 | 16 |  |
|  | 16CXS29-09 |  | 317.0 |  | 304 | 296 | 16.0 | -21 | 13 |  |
|  | 16CXS29-10 |  | 316.0 |  | 271 | 244 | 17.0 | -72 | 45 |  |
|  | 16CXS29-11 |  | 313.0 |  | 308 | 305 | 16.0 | -8 | 5 |  |
|  | 16CXS29-12 |  | 310.0 |  | 314 | 316 | 16.0 | 6 | -4 |  |
|  | 16CXS29-13 |  | 317.0 |  | 299 | 288 | 16.0 | -29 | 18 |  |
|  | 16CXS29-14 |  | 318.0 |  | 268 | 236 | 17.0 | -82 | 50 |  |
|  | 16CXS29-15 |  | 319.0 |  | 328 | 334 | 16.0 | 15 | -9 |  |
|  | 16CXS29-16 |  | 311.0 |  | 338 | 354 | 15.0 | 43 | -27 |  |
|  | 16CXS29-17 |  | 315.0 |  | 260 | 227 | 17.0 | -88 | 55 |  |
|  | 16CXS29-18 |  | 316.0 |  | 311 | 309 | 16.0 | -7 | 5 |  |
|  | 16CXS29-19 |  | 310.0 |  | 307 | 305 | 16.0 | -5 | 3 |  |
|  | 16CXS29-20 |  | 320.0 |  | 280 | 255 | 17.0 | -65 | 40 |  |
|  | 16CXS29-21 |  | 313.0 |  | 353 | 378 | 15.0 | 65 | -40 |  |
|  | 16CXS29-22 |  | 316.0 |  | 320 | 323 | 16.0 | 7 | -4 |  |
|  | 16CXS29-23 |  | 311.0 |  | 285 | 268 | 17.0 | -43 | 26 |  |
|  | 16CXS29-24 |  | 319.0 |  | 401 | 452 | 14.0 | 133 | -82 |  |
|  | 16CXS29-25 |  | 308.0 |  | 256 | 224 | 17.0 | -84 | 52 |  |
|  | 16CXS29-26 |  | 318.0 |  | 321 | 324 | 16.0 | 6 | -3 |  |
|  | 16CXS29-27 |  | 318.0 |  | 469 | 554 | 12.0 | 236 | -151 |  |
|  | 16CXS40-01 | Granite | 316.0 |  | 277 | 255 | 17.0 | -61 | 39 |  |
|  | 16CXS40-02 |  | 310.0 |  | 322 | 329 | 16.0 | 19 | -12 |  |
|  | 16CXS40-03 |  | 310.0 |  | 245 | 207 | 17.0 | -103 | 65 |  |
|  | 16CXS40-04 |  | 310.0 |  | 269 | 245 | 17.0 | -65 | 41 |  |
|  | 16CXS40-05 |  | 311.0 |  | 262 | 233 | 17.0 | -78 | 49 |  |
|  | 16CXS40-06 |  | 316.0 |  | 274 | 250 | 17.0 | -66 | 42 |  |
|  | 16CXS40-07 |  | 315.0 |  | 308 | 304 | 16.0 | -11 | 7 |  |
| Shuanglong | SL14-016-10 | Diorite enclave | 327.3 | 1.24 | 398 | 435 | 14.1 | 107 | -71 | Zhao et al., 2019a |
|  | SL14-016-14 |  | 328.3 | 0.89 | 356 | 372 | 15.1 | 44 | -27 |  |
|  | SL14-016-15 |  | 329.6 | 0.58 | 361 | 377 | 15.0 | 47 | -31 |  |
|  | SL14-016-17 |  | 327.3 | 0.69 | 363 | 383 | 14.9 | 56 | -35 |  |
|  | SL14-016-18 |  | 328.1 | 0.64 | 425 | 480 | 13.4 | 152 | -97 |  |
|  | SL14-016-19 |  | 329.0 | 0.69 | 363 | 383 | 14.9 | 54 | -34 |  |
|  | SL14-016-22 |  | 331.1 | 0.86 | 400 | 438 | 14.1 | 107 | -69 |  |
|  | SL14-016-25 |  | 328.9 | 0.71 | 332 | 334 | 15.7 | 5 | -3 |  |
|  | SL14-016-26 |  | 330.6 | 1.01 | 399 | 435 | 14.2 | 104 | -69 |  |
|  | SL14-016-29 |  | 328.7 | 1.48 | 419 | 469 | 13.6 | 140 | -90 |  |
|  | SL14-001-1-3 | Diorite | 322.5 | 1.33 | 503 | 579 | 11.8 | 257 | -180 |  |
|  | SL14-001-1-5 |  | 323.0 | 1.17 | 364 | 387 | 14.8 | 64 | -41 |  |
|  | SL14-001-1-8 |  | 323.9 | 0.72 | 333 | 339 | 15.6 | 15 | -10 |  |
|  | SL14-001-1-9 |  | 323.0 | 1.29 | 373 | 397 | 14.6 | 74 | -50 |  |
|  | SL14-001-1-10 |  | 323.1 | 1.10 | 455 | 511 | 12.9 | 188 | -132 |  |
|  | SL14-001-1-11 |  | 322.2 | 0.61 | 415 | 468 | 13.5 | 146 | -92 |  |
|  | SL14-001-1-16 |  | 324.2 | 1.03 | 394 | 432 | 14.1 | 107 | -70 |  |
|  | SL14-001-1-18 |  | 323.2 | 1.02 | 416 | 471 | 13.5 | 148 | -93 |  |
|  | SL14-001-1-21 |  | 322.8 | 0.64 | 550 | 677 | 10.3 | 355 | -227 |  |
|  | SL14-001-1-23 |  | 321.1 | 0.89 | 345 | 360 | 15.2 | 38 | -24 |  |
|  | SL14-001-1-30 |  | 323.6 | 0.43 | 482 | 572 | 11.9 | 248 | -159 |  |
|  | SL14-004-2-5 | Monzogranite | 311.1 | 0.67 | 359 | 388 | 14.6 | 77 | -48 |  |
|  | SL14-004-2-7 |  | 312.4 | 0.70 | 372 | 405 | 14.4 | 93 | -60 |  |
|  | SL14-004-2-12 |  | 313.9 | 0.83 | 376 | 412 | 14.3 | 98 | -63 |  |
|  | SL14-004-2-14 |  | 311.8 | 0.56 | 371 | 402 | 14.4 | 91 | -59 |  |
|  | SL14-004-2-17 |  | 312.2 | 0.84 | 335 | 348 | 15.3 | 36 | -22 |  |
|  | SL14-004-2-19 |  | 314.8 | 0.60 | 401 | 451 | 13.7 | 136 | -87 |  |
|  | SL14-004-2-22 |  | 314.9 | 0.60 | 383 | 423 | 14.2 | 108 | -68 |  |
|  | SL14-017-7 | Granodiorite | 308.0 | 0.57 | 334 | 349 | 15.2 | 40 | -26 |  |
|  | SL14-017-10 |  | 305.7 | 0.57 | 398 | 452 | 13.6 | 147 | -92 |  |
|  | SL14-017-14 |  | 305.8 | 0.66 | 377 | 416 | 14.1 | 111 | -71 |  |
|  | SL14-017-15 |  | 307.5 | 0.66 | 355 | 383 | 14.7 | 75 | -47 |  |
|  | SL14-017-27 |  | 307.0 | 0.72 | 349 | 374 | 14.8 | 67 | -43 |  |
|  | SL14-017-32 |  | 309.3 | 0.61 | 340 | 357 | 15.1 | 48 | -30 |  |
| Hongshanliang | HSL14-004-1 | Granite porphyry | 343.1 | 0.63 | 805 | 1044 | 4.77 | 701 | -462 | Zhao et al., 2019b |
|  | HSL14-004-5 |  | 343.3 | 0.52 | 898 | 1206 | 2.24 | 863 | -555 |  |
|  | HSL14-004-7 |  | 343.1 | 0.61 | 1026 | 1388 | -0.64 | 1045 | -683 |  |
|  | HSL14-004-9 |  | 343.3 | 0.53 | 875 | 1176 | 2.71 | 833 | -532 |  |
|  | HSL14-004-11 |  | 342.4 | 0.45 | 784 | 1028 | 5.03 | 686 | -442 |  |
|  | HSL14-004-18 |  | 342.5 | 0.61 | 863 | 1151 | 3.10 | 808 | -520 |  |
|  | HSL14-004-19 |  | 342.5 | 0.52 | 873 | 1146 | 3.18 | 804 | -531 |  |
|  | HSL14-004-24 |  | 343.9 | 0.58 | 881 | 1179 | 2.67 | 835 | -537 |  |
|  | HSL14-004-30 |  | 343.1 | 0.57 | 931 | 1250 | 1.54 | 907 | -588 |  |
| Chilongfeng | CL13-009-1 | Biotite diorite | 317.3 | 0.94 | 466 | 544 | 12.3 | 227 | -149 | Zhao et al., 2018 |
|  | CL13-009-5 |  | 317.3 | 0.92 | 272 | 247 | 16.9 | -70 | 45 |  |
|  | CL13-009-7 |  | 317.3 | 1.23 | 295 | 287 | 16.3 | -30 | 22 |  |
|  | CL13-009-9 |  | 316.7 | 1.11 | 507 | 590 | 11.6 | 273 | -190 |  |
|  | CL13-009-10 |  | 315.9 | 0.88 | 377 | 403 | 14.5 | 87 | -61 |  |
|  | CL13-009-11 |  | 315.9 | 2.53 | 351 | 368 | 15.0 | 52 | -35 |  |
|  | CL13-009-14 |  | 316.1 | 0.88 | 396 | 431 | 14.0 | 115 | -80 |  |
|  | CL13-009-16 |  | 316.1 | 0.73 | 482 | 563 | 12.0 | 247 | -166 |  |
|  | CL13-009-20 |  | 316.4 | 0.94 | 402 | 449 | 13.8 | 133 | -86 |  |
|  | CL13-009-23 |  | 316.9 | 0.69 | 399 | 442 | 13.9 | 125 | -82 |  |
|  | CL13-009-25 |  | 316.1 | 1.57 | 593 | 687 | 10.0 | 371 | -277 |  |
|  | CL13-010-2 | Granodiorite | 307.0 | 0.42 | 323 | 332 | 15.5 | 25 | -16 |  |
|  | CL13-010-10 |  | 306.0 | 0.50 | 290 | 281 | 16.3 | -25 | 16 |  |
|  | CL13-010-15 |  | 305.5 | 0.41 | 323 | 333 | 15.4 | 28 | -18 |  |
|  | CL13-010-19 |  | 305.9 | 0.39 | 347 | 371 | 14.9 | 65 | -41 |  |
|  | CL13-010-21 |  | 305.0 | 0.51 | 284 | 272 | 16.4 | -33 | 21 |  |
|  | CL13-010-22 |  | 306.4 | 0.54 | 316 | 321 | 15.6 | 15 | -10 |  |
|  | CL13-010-23 |  | 305.0 | 0.61 | 302 | 301 | 15.9 | -4 | 3 |  |
|  | CL13-010-24 |  | 305.0 | 0.64 | 260 | 233 | 17.0 | -72 | 45 |  |
|  | CL13-010-26 |  | 305.8 | 0.48 | 329 | 343 | 15.3 | 37 | -23 |  |
|  | CL13-010-28 |  | 305.8 | 0.53 | 277 | 261 | 16.6 | -45 | 29 |  |
| Bailingshan | BL-065-2 | Granodiorite | 320.4 | 0.87 | 693 | 902 | 6.70 | 582 | -373 | Zhang et al., 2016b |
|  | BL-065-5 |  | 311.5 | 0.83 | 648 | 846 | 7.50 | 535 | -337 |  |
|  | BL-065-6 |  | 321.3 | 0.63 | 705 | 918 | 6.50 | 597 | -384 |  |
|  | BL-065-9 |  | 322.3 | 0.74 | 713 | 935 | 6.20 | 613 | -391 |  |
|  | BL-065-10 |  | 315.9 | 0.81 | 711 | 932 | 6.20 | 616 | -395 |  |
|  | BL-065-13 |  | 323.7 | 0.70 | 768 | 1023 | 4.90 | 699 | -444 |  |
|  | BL-065-14 |  | 313.4 | 0.66 | 782 | 1053 | 4.30 | 740 | -469 |  |
|  | BL-065-15 |  | 315.4 | 0.75 | 836 | 1120 | 3.30 | 805 | -521 |  |
|  | BL-065-16 |  | 318.1 | 0.61 | 701 | 910 | 6.60 | 592 | -383 |  |
|  | BL-065-18 |  | 317.4 | 0.68 | 697 | 913 | 6.50 | 596 | -380 |  |
|  | BL-058-1 | Monzogranite | 306.1 | 0.72 | 412 | 474 | 13.3 | 168 | -106 |  |
|  | BL-058-2 |  | 310.4 | 0.63 | 510 | 626 | 10.9 | 316 | -200 |  |
|  | BL-058-6 |  | 317.5 | 0.65 | 450 | 528 | 12.5 | 211 | -133 |  |
|  | BL-058-7 |  | 307.6 | 0.71 | 438 | 514 | 12.6 | 206 | -130 |  |
|  | BL-058-8 |  | 317.3 | 0.62 | 442 | 517 | 12.7 | 200 | -125 |  |
|  | BL-058-11 |  | 316.8 | 0.74 | 437 | 507 | 12.9 | 190 | -120 |  |
|  | BL-058-12 |  | 313.6 | 0.69 | 408 | 462 | 13.5 | 148 | -94 |  |
|  | BL-058-14 |  | 314.2 | 0.65 | 434 | 506 | 12.8 | 192 | -120 |  |
|  | BL-058-16 |  | 313.4 | 0.63 | 446 | 521 | 12.6 | 208 | -133 |  |
|  | BL-058-17 |  | 312.0 | 0.60 | 476 | 571 | 11.8 | 259 | -164 |  |
|  | BL-050-1 | Granite | 301.9 | 0.60 | 364 | 400 | 14.3 | 98 | -62 |  |
|  | BL-050-2 |  | 313.2 | 0.52 | 541 | 675 | 10.2 | 362 | -228 |  |
|  | BL-050-4 |  | 311.7 | 0.68 | 419 | 482 | 13.2 | 170 | -107 |  |
|  | BL-050-10 |  | 311.3 | 0.60 | 371 | 406 | 14.4 | 95 | -60 |  |
|  | BL-050-11 |  | 306.2 | 0.80 | 495 | 592 | 11.4 | 286 | -189 |  |
|  | BL-050-12 |  | 305.4 | 0.60 | 425 | 496 | 12.9 | 191 | -120 |  |
|  | BL-050-15 |  | 304.1 | 0.84 | 409 | 471 | 13.3 | 167 | -105 |  |
|  | BL-050-18 |  | 312.2 | 0.54 | 409 | 467 | 13.4 | 155 | -97 |  |
|  | BL-050-19 |  | 308.5 | 0.48 | 399 | 452 | 13.6 | 144 | -91 |  |
|  | BL-050-20 |  | 303.7 | 0.62 | 418 | 484 | 13.1 | 180 | -114 |  |

**Appendix: Analytical methods**

Zircons were separated using conventional heavy liquid and magnetic techniques, and then handpicked under a binocular microscope. Zircon grains were mounted in epoxy resin and polished to expose the crystal centers. In order to observe the internal structure of the polished zircons, cathodoluminescence (CL) imaging was carried out using a JXA-8100 Electron Probe Microanalyzer with a Mono CL3 Cathodoluminescence System for high resolution imaging and spectroscopy at the State Key Laboratory of Isotope Geochemistry, Guangzhou Institute of Geochemistry, Chinese Academy of Sciences (SKLaIG, GIG, CAS). The detailed analytical technique and U–Pb dating are presented in Du et al. (2018a, 2018b, 2019a, 2019b).

Zircon Lu**–**Hf isotope analyses were performed using a Neptune Plus multi-collector (MC)–ICP–MS (Thermo Fisher Scientific, Germany), coupled to a 193 nm excimer laser ablation system (RESOlution M-50) at the SKLaIG, GIG, CAS. The measured isotopic ratios of 176Hf/177Hf were normalized to 179Hf/177Hf = 0.7325, using exponential correction for mass bias. The in-situ measured 173Yb/172Yb ratio was used for mass bias correction for both Yb and Lu because Lu only has two isotopes and similar fractionation during instrumental analysis. Ratios used for the corrections were 0.5886 for 176Yb/172Yb (Chu et al., 2002) and 0.02655 for 176Lu/175Lu (Machado and Simonetti, 2001). The measured 176Lu/177Hf ratios and the 176Lu decay constant of 1.867×10−11 year−1 reported by Söderlund et al. (2004) were used to calculate initial 176Hf/177Hf ratios. Chondritic values of 176Lu/177Hf = 0.0332 and 176Hf/177Hf = 0.282772 reported by Blichert-Toft and Albarède (1997) were used for the calculation of εHf(t) values. The depleted mantle line is defined by present-day 176Lu/177Hf = 0.0384 and 176Hf/177Hf = 0.28325 (Griffin et al., 2004). Single-stage Hf model ages (TDM) were calculated relative to the depleted mantle which is assumed to have linear isotopic growth from 176Hf/177Hf = 0.279718 at 4.55Ga, to 0.28325 at present, with a 176Lu/177Hf = 0.0384 (Griffin et al., 2004), and two-stage Hf model ages (TDMC) were calculated assuming a mean 176Lu/177Hf value of 0.015 for the average continental crust (Griffin et al., 2002). The Lu**–**Hf isotopic data from this study and previous literature are listed in Appendix Table S1 and S2, respectively.

**References**

Blichert-Toft, J., Albarède, F., 1997. The Lu-Hf geochemistry of chondrites and the evolution of the mantle-crust system. Earth and Planetary Science Letters 148, 243–258.

Cao, M.J., Qin, K.Z., Li, G.M., Evans, N.J., McInnes, B.I.A., Lu, W.W., Deng, G., 2017. Petrogenesis of the Baishan granite stock, Eastern Tianshan, NW China: Geodynamic setting and implications for potential mineralization. Lithos 292–293, 278–293.

Chen, X.J., Zhang, K.H., Zhou, J., 2016. Geochronology and geochemistry characteristics of the Early Permian monzogranite and dioritic enclaves of East Tianshan and their tectonic implications. Acta Geologica Sinica 90, 2334–2354 (in Chinese with English abstract).

Chu, N.C., Taylor, R.N., Chavagnae, V., Nesbitt, R.W., Boela, R.M., Milton, J.A., German, C.R., Bayon, G., Burton, K., 2002. Hf isotope ratio analysis using multi-collector inductively coupled plasma mass spectrometry: An evaluation of isobaric interference corrections. Journal of Analytical Atomic Spectrometry 17, 1567–1574.

Du, L., Long, X.P., Yuan, C., Zhang, Y.Y., Huang, Z.Y., Sun, M., Zhao, G.C., Xiao, W.J., 2018a. Early Paleozoic dioritic and granitic plutons in the Eastern Tianshan Orogenic Belt, NW China: Constraints on the initiation of a magmatic arc in the Southern Central Asian Orogenic Belt. Journal of Asian Earth Sciences 153, 139–153.

Du, L., Long, X.P., Yuan, C., Zhang, Y.Y., Huang, Z.Y., Wang, X.Y., Yang, Y.H., 2018b. Mantle contribution and tectonic transition in the Aqishan-Yamansu Belt, Eastern Tianshan, NW China: Insights from geochronology and geochemistry of Early Carboniferous to Early Permian felsic intrusions. Lithos 304–307, 230–244.

Du, L., Yuan, C., Li, X.-P., Zhang, Y.Y., Huang, Z.Y., Long, X.P., 2019a. Petrogenesis and geodynamic implications of the Carboniferous granitoids in the Dananhu Belt, Eastern Tianshan Orogenic Belt. Journal of Earth Science 30, 1243–1252.

Du, L., Zhang, Y.Y., Huang, Z.Y., Li, X.-P., Yuan, C., Wu, B., Long, X.P., 2019b. Devonian to Carboniferous tectonic evolution of the Kangguer Ocean in the Eastern Tianshan, NW China: Insights from three episodes of granitoids. Lithos 350–351, 105243.

Griffin, W.L., Wang, X., Jackson, S.E., Pearson, N.J., O’Reilly, S.Y., Xu, X., Zhou, X., 2002. Zircon chemistry and magma mixing SE China: In-situ analysis of Hf isotopes. Tonglu and Pingtan igneous complexes. Lithos 61, 237–269.

Griffin, W.L., Belousova, E.A., Shee, S.R., Pearson, N.J., O’Reily, S.Y., 2004. Archean crustal evolution in the northern Yilgarn Craton: U–Pb and Hf-isotope evidence from detrital zircons. Precambrian Research 13l, 23l–282l.

Long, X.P., Wu, B., Sun, M., Yuan, C., Xiao, W.J., Zuo, R., 2020. Geochronology and geochemistry of Late Carboniferous dykes in the AqishaneYamansu belt, eastern Tianshan: Evidence for a post-collisional slab breakoff. Geoscience Frontiers 11, 347–362.

Machado, N., Simonetti, A., 2001. U‒Pb dating and Hf isotopic composition of zircon by laser-ablation-MC-ICP-MS. In: Sylvester, P. (Ed.), Short Course Series, Vol. 29. Mineralogical Association of Canada, pp. 121–146.

Söderlund, U., Patchett, P.J., Vervoort, J.D., Isachsen, C.E., 2004. The 176Lu decay constant determined by Lu–Hf and U–Pb isotope systematics of Precambrian mafic intrusions. Earth and Planetary Science Letters 219, 311–324.

Su, B.X., Qin, K.Z., Sakyi, P.A., Li, X.H., Yang, Y.H., Sun, H., Tang, D.M., Liu, P.P., Xiao, Q.H., Malaviarachchi, S.P.K., 2011. U–Pb ages and Hf–O isotopes of zircons from Late Paleozoic mafic–ultramafic units in southern Central Asian Orogenic Belt: tectonic implications and evidence for an Early-Permian mantle plume. Gondwana Research 20, 516–531.

Sun, Y., Wang, J.B., Wang, Y.W., Long, L.L., Mao, Q.G., Yu, M.J., 2019. Ages and origins of granitoids from the Kalatag Cu cluster in Eastern Tianshan, NW China: Constraints on Ordovician–Devonian arc evolution and porphyry Cu fertility in the Southern Central Asian orogenic belt. Lithos 330–331, 55–73.

Wang, Y.F., Chen, H.Y., Han, J.S., Chen, S.B., Huang, B.Q., Li, C., Tian, Q.L., Wang, C., Wu, J.X., Chen, M.X., 2018. Paleozoic tectonic evolution of the Dananhu-Tousuquan island arc belt, Eastern Tianshan: Constraints from the magmatism of the Yuhai porphyry Cu deposit, Xinjiang, NW China. Journal of Asian Earth Sciences 153, 282–306.

Wang, Y.H, Zhang, F.F., Liu, J.J., Que, C.Y., 2016a. Carboniferous magmatism and mineralization in the area of the Fuxing Cu deposit, Eastern Tianshan, China: Evidence from zircon U–Pb ages, petrogeochemistry, and Sr–Nd–Hf–O isotopic compositions. Gondwana Research 34, 109–128.

Wang, Y.H., Zhang, F.F., Liu, J.J., 2016b. The genesis of the ores and intrusions at the Yuhai Cu–Mo deposit in eastern Tianshan, NW China: Constraints from geology, geochronology, geochemistry, and Hf isotope systematics. Ore Geology Reviews 77, 312–331.

Xiao, B., Chen, H.Y., Wang, Y.F., Yang, J.T., 2015. Discovery of the Late Silurian granodiorite and its tectonic significance in the Tuwu-Yandong porphyry copper deposits, Dananhu-Tousuquan island belt, Eastern Tianshan. Earth Science Frontiers 22, 251–266 (in Chinese with English abstract).

Xiao, B., Chen, H.Y., Hollings, P., Han, J.S., Wang, Y.F., Yang, J.T., Cai, K.D., 2017. Magmatic evolution of the Tuwu–Yandong porphyry Cu belt, NW China: Constraints from geochronology, geochemistry and Sr–Nd–Hf isotopes. Gondwana Research 43, 74–91.

Zhang, F.F., Wang, Y.H., Liu, J.J., 2016a. Petrogenesis of Late Carboniferous granitoids in the Chihu area of Eastern Tianshan, Northwest China, and tectonic implications: geochronological, geochemical, and zircon Hf–O isotopic constraints. International Geology Review 58, 949–966.

Zhang, W.F., Chen, H.Y., Han, J.S., Zhao, L.D., Huang, J.H., Yang, J.T., Yan, X.L., 2016b. Geochronology and geochemistry of igneous rocks in the Bailingshan area: Implications for the tectonic setting of late Paleozoic magmatism and iron skarn mineralization in the eastern Tianshan, NW China. Gondwana Research 38, 40–59.

Zhao, L.D., Chen, H.Y., Zhang, L., Zhang, W.F., Yang, J.T., Yan, X.L., 2018. The Late Paleozoic magmatic evolution of the Aqishan-Yamansu belt, Eastern Tianshan: Constraints from geochronology, geochemistry and Sr–Nd–Pb–Hf isotopes of igneous rocks. Journal of Asian Earth Sciences 153, 170–192.

Zhao, L.D., Chen, H.Y., Hollings, P., Han, J.S., 2019a. Late Paleozoic magmatism and metallogenesis in the Aqishan-Yamansu belt, Eastern Tianshan: Constraints from the Bailingshan intrusive complex. Gondwana Research 65, 68–85.

Zhao, L.D., Chen, H.Y., Hollings, P., Han, J.S., 2019b. Tectonic transition in the Aqishan-Yamansu belt, Eastern Tianshan: Constraints from the geochronology and geochemistry of Carboniferous and Triassic igneous rocks. Lithos 344–345, 247–264.
